# Supplementary material for: Commercial Gene Expression Tests for Prostate Cancer Prognosis Provide Paradoxical Estimates of Race-Specific Risk
Source: Oxford University Press journal article supplement (doi:10.1158/1055-9965.epi-19-0407), 2019-11-22
Supplement: 10559965epi190407-sup-220547_3_supp_6869734_qn33z3.xlsx [file 10559965epi190407-sup-220547_3_supp_6869734_qn33z3.xlsx]

## Sheet: 220547_0_supp_5455066_ppt1v1
ID	Race	nccn	CAPRASgroup	ANO7	ASF1B	ASPM	AZGP1	BGN	BIRC5	BUB1B	C6orf10	CAMK2N1	CDC20	CDCA3	CDK1	CDKN3	CENPF	CENPM	CEP55	COL1A1	DLGAP5	DTL	EPPK1	FAM13C	FLNC	FOXM1	GSN	GSTM2	IQGAP3	KIAA0101	KIF11	KIF20A	KLK2	LASP1	MCM10	MYBPC1	NFIB	NUSAP1	ORC6	PBK	PBX1	PCAT-32	PCAT-80	PCDH7	PLK1	PRC1	PTTG1	RABGAP1	RAD51
1	AAM	Intermediate	INTERMEDIATE	10.9	4.11	3.78	13.26	10.62	5.95	4.59	3.78	10.74	5.11	3.78	5.37	3.78	5.24	5.59	1.78	11.4	3.78	4.11	8.16	9.44	11.12	5.24	12.41	9.54	3.78	4.11	4.11	4.11	14.86	8.81	4.78	10.69	10.07	6.48	4.59	2.78	10.45	1.78	1.78	8.11	4.59	3.78	6.31	9.18	4.59
2	AAM	Intermediate	LOW	10.5	6	5.64	13.75	11.53	6.64	5.64	3.41	9.7	5.64	5.15	5.64	6.08	6.15	6.15	5.53	12.85	4.83	2.83	8.54	8.41	10.5	6.22	12.14	9.69	5.15	5.15	5.64	5.64	14.32	9.75	5.92	9.99	10.5	7.41	5.74	5.41	10.05	1.83	2.83	9.19	4.64	4.15	7.19	8.77	5
3	AAM	High	LOW	11.2	4.44	4.63	12.54	10.2	6.63	5.44	3.21	9	5.99	1.63	6.21	5.27	6.82	6.05	5.58	10.27	3.63	3.44	8.74	9.57	8.69	5.33	11.06	8.89	5.21	2.95	5.67	4.33	15.35	7.78	4.33	9.77	10.18	6.41	5.76	4.63	9.2	2.95	1.63	7	4.44	4.21	6.65	8.55	3.21
4	AAM	Intermediate	LOW	11.45	4.88	4.19	14.34	10.22	5.54	4.4	3.66	9.65	5.3	3.66	4.4	3.95	5.02	4.81	3.81	11.33	3.08	1.49	9.23	9.49	10.67	4.58	11.89	11.14	4.74	4.3	4.95	3.49	15.01	9.29	3.49	8.11	10.26	6.02	5.14	3.3	10.99	1.49	3.08	9.5	5.25	3.66	6.58	9.33	2.08
5	AAM	Intermediate	LOW	10.47	3.56	4.37	12.96	10.34	4.84	4.56	2.98	9.71	5.73	3.79	5.37	4.3	5.23	4.84	4.56	11.05	1.98	1.56	8.14	9.47	9.91	5.02	11.99	9.35	3.15	3.44	4.44	3.56	14.83	8.45	3.79	8.65	10.12	5.23	4.89	3.56	9.68	3.44	2.98	8.34	4.79	3.79	6.09	9.04	3.3
6	AAM	Intermediate	LOW	10.91	5.98	5.2	14.78	10.89	7.17	5.85	5.06	8.97	6.39	4.51	7.27	5.67	7.25	5.06	5.94	11.58	2.81	3.13	9.34	9.81	9.03	5.76	11.41	8.84	5.39	4.39	5.61	4.51	15.93	8.73	4.61	8.7	9.76	6.51	6.42	4.61	9.3	2.39	2.39	7.81	6.09	4.71	7.44	8.96	4.89
7	AAM	High	INTERMEDIATE	7.54	5.36	4.18	12.36	11.62	5.7	5.03	3.44	10.69	6.2	4.73	5.48	5.13	5.23	5.4	4.73	12.1	3.44	1.86	8.81	8.57	12.78	5.13	13.51	10.96	5.56	3.86	5.08	5.03	11.95	9.2	4.18	10.64	9.79	5.92	5.4	5.03	10.66	4.27	3.59	9.99	4.27	4.27	7.1	8.97	3.59
8	AAM	Intermediate	LOW	11.35	3.68	3.82	14.47	10.33	5.16	5	3.68	10.18	5.22	3.53	5.11	4.44	4.88	5.36	3.94	11.03	2.68	1.94	7.52	10.37	11.5	4.68	12.61	10.7	3.82	3.82	4.68	3.36	15.26	8.73	3.36	11.46	9.83	5.06	5.16	2.94	10.5	1.94	1.36	8.77	4.16	4.06	6.42	9	2.94
9	AAM	Intermediate	LOW	9.48	6.15	5.96	15.17	12.11	7.52	5.88	3.92	9.75	6.82	4.21	7.77	6.51	7.79	6.64	6.61	11.69	4.56	4.08	7.89	10.02	10.22	6.28	12.03	9.73	6.18	4.45	6.21	5.61	14.61	9.31	5.56	10.69	9.14	7.29	6.18	5.84	9.83	2.34	2.34	8.45	5.21	5	8.02	8.96	4.21
10	AAM	High	INTERMEDIATE	10.3	4.75	4.7	14.27	11.1	6.13	4.33	3.11	8.68	5.87	3.64	6.33	5.43	5.96	5.33	4.8	11.05	4.19	3.26	6.75	9.76	9.23	5.11	11.37	8.93	3.94	3.75	5.72	4.11	15.5	8.33	3.64	10.53	9.74	6.23	5.19	4.26	9.57	1.53	2.26	7.62	4.94	4.33	7.05	8.44	4.33
11	AAM	Intermediate	LOW	11.31	5.01	3.6	14.47	10.67	5.71	4.6	4.18	10.82	5.1	3.33	5.47	4.6	5.26	5.26	4.47	11.87	2.6	2.01	8.18	10.03	11.88	4.92	13.02	11.19	4.71	3.82	4.47	1.01	14.93	9.34	4.01	10.59	10	6.14	4.92	2.01	10.95	2.01	3.6	8.95	4.18	3.82	6.53	9.51	3.82
12	AAM	Intermediate	LOW	10.72	4.77	4.96	14.69	10.46	5.45	4.48	3.66	9.5	5.42	4.6	5.09	4.48	5.39	5.05	4.13	11.09	2.54	3.13	8.71	10.42	10.92	4.82	12.07	10.14	4.35	3.54	4.82	3.77	15.07	9.04	4.05	9.31	9.81	5.09	4.42	3.54	10.25	3.13	2.28	9.47	3.87	4.13	6.79	9.2	2.77
13	AAM	Intermediate	LOW	10.33	4.26	3.61	14.64	10.64	5.66	4.57	3.16	9.14	5.11	3.06	5.8	4.49	5.24	4.85	3.36	10.46	2.82	3.44	7.43	9.84	9.73	4.94	11.66	9.74	4.06	3.16	4.68	3.06	14.87	8.52	3.16	9.31	9.57	5.38	5.33	2.94	9.83	1.94	2.16	8.49	4.44	3.75	6.49	8.79	3.94
14	AAM	Intermediate	LOW	10.66	3.88	4.29	14.54	10.99	4.84	3.95	2.88	9.8	5.54	3.71	5.23	3.61	5.06	5.13	4.03	10.56	0.71	2.03	8.54	9.53	10.86	4.41	12.42	10.85	4.03	3.51	4.99	3.17	14.39	9.28	3.17	9.09	10.21	5.1	4.99	2.71	10.87	2.29	2.29	9.59	3.79	3.51	6.65	9.35	2.88
15	AAM	Intermediate	LOW	10.51	4.6	2.53	14.5	11.11	5.12	4.6	3.53	10.41	4.97	3.8	5.07	5.07	4.02	5.97	4.67	10.73	3.53	2.53	7.98	9.54	11.88	4.21	13.17	10.15	4.67	3.38	4.74	3.91	14.41	9.07	3.67	11.54	9.76	5.88	4.97	4.02	10.26	0.21	1.8	9.03	4.02	4.21	6.72	8.66	3.67
16	AAM	Intermediate	LOW	10.82	4.71	4.23	14.21	10.27	5.39	4.46	3.87	10.1	5.23	4.06	5.23	4.06	5.35	4.15	2.87	10.97	2.39	2.65	7.56	10.09	11.5	4.52	12.59	10.51	4.39	3.52	4.82	3.39	14.76	8.77	3.23	10.61	10.01	4.71	5.11	3.06	10.17	2.06	1.06	8.9	4.23	3.76	6.13	8.97	3.23
17	AAM	High	INTERMEDIATE	11.32	5.17	5.42	14.13	10.96	6.23	4.82	3.87	9.55	6.19	3.77	6.64	5.39	6.5	4.82	5.05	11.83	3.42	0.97	8.36	10.29	10.4	4.82	12.55	10.16	5.72	3.77	5.85	4.77	15.58	8.67	4.29	10.36	9.86	6.27	4.92	4.21	10.45	2.55	1.55	8.61	5.36	4.72	7.47	9.1	3.97
18	AAM	Intermediate	LOW	10.8	3.85	3.56	14.74	11.09	4.78	4.19	3.56	9.14	5.14	4.09	4.64	3.71	3.71	5.14	3.19	10.46	2.71	2.39	6.86	10.03	9.31	4.97	12.19	10.07	4.39	1.97	5.03	2.71	15.61	8.64	3.19	10.12	9.87	5.25	4.78	3.19	9.96	2.97	2.71	8.12	4.85	3.19	6.71	8.8	3.19
19	AAM	High	INTERMEDIATE	9.72	4.22	4.43	12.58	11.01	4.72	4.26	3.66	11.04	5.45	3.72	5.07	4.12	5.29	4.31	3.17	11.01	2.58	3.07	7.5	9.15	10.53	4.43	12.3	10.29	4.66	2.72	4.72	3.35	14.87	8.36	3.07	7.28	9.73	5.02	5.17	3.51	10.1	2.43	3.17	8.36	5.07	3.26	6.43	8.72	2.43
20	AAM	High	INTERMEDIATE	10.77	4.53	4.25	11.39	11.14	6.01	5.01	3.18	10.49	6.01	2.72	6.01	5.15	6.37	4.77	3.63	10.6	3.72	2.72	7.93	9.36	9.6	4.77	11.98	9.13	4.89	2.72	4.25	4.37	14.9	8.11	3.97	7.56	9.75	5.61	5.5	3.31	9.2	1.31	2.53	7.04	3.97	4.58	6.62	8.6	2.89
21	AAM	Intermediate	LOW	11	1.87	3.19	15.08	10.53	3.96	3.19	3.87	10.01	5.33	2.46	4.12	3.04	3.78	3.87	2.87	10.92	2.46	3.04	8.12	9.5	10.99	4.26	12.88	11.09	4.12	1.87	3.87	1.87	14.71	9	2.68	7.93	10.03	4.19	4.46	2.87	10.77	2.87	0.87	9.39	4.63	3.78	6.6	9.16	3.19
22	AAM	Intermediate	LOW	10.36	4.39	4.15	13.84	10.52	5.15	4.31	3.39	9.94	5.02	3.77	5.2	4.24	4.92	4.39	3.87	10.77	1.65	3.53	7.01	9.73	10.88	4.31	12.38	10.21	3.87	3.53	4.77	3.07	14.94	8.36	2.87	10.9	9.79	5.39	4.71	3.24	10.17	1.65	2.65	8.16	3.07	2.87	6.33	8.77	3.77
23	AAM	High	INTERMEDIATE	9.98	3.89	4.53	14.12	10.5	5.65	4.36	3.53	9.93	5.47	4.04	5.33	5.15	5.24	4.85	3.81	10.42	2.04	0.72	7.46	9.22	9.3	4.97	11.61	8.82	4.72	2.89	4.76	4.11	15.26	8.58	3.3	10.94	9.89	5.21	4.76	3.53	9.6	0.72	2.72	7.92	4.93	3.89	6.71	8.56	2.53
24	AAM	Low	LOW	7.47	4.64	5.12	12.05	11.2	5.29	4.8	1.1	10.48	5.94	3.54	6.19	5.47	5.5	4.89	4.64	12.87	3.64	3.31	7.19	8.37	10.58	5.27	12.73	10.04	5.01	3.03	5.34	3.69	12.03	8.83	3.64	8.53	9.62	5.59	5.45	3.48	10.37	0	2.37	9.41	4.66	4.14	6.96	8.43	3.91
25	EAM	Low	LOW	11.14	4.13	4.39	14.31	10.87	5.61	5.13	4.89	9.82	5.97	3.61	5.26	3.39	5.33	5.05	3.97	11.83	3.61	2.8	8.59	10.02	11.15	5.05	12.1	10.79	4.13	4.61	4.5	3.61	14.85	9.2	4.71	9.7	10.12	5.71	5.76	3.39	10.64	2.39	2.8	9.41	4.39	3.61	6.73	9.68	3.61
26	EAM	High	INTERMEDIATE	10.68	4.78	3.94	14.1	11.14	4.94	4.14	4.14	9.79	5.38	3.84	4.89	4.38	4.72	4.78	4.31	10.92	2.46	2.72	8.42	9.42	10.92	4.66	12.31	10.12	3.94	3.6	4.66	2.94	14.36	8.85	3.46	10.39	9.93	5.27	5.18	2.94	10.38	1.14	2.14	9.32	4.78	4.14	6.58	9.26	3.14
27	EAM	Intermediate	LOW	9.92	6.05	6.05	14.04	10.06	5.69	5.08	3.92	9.37	6.71	6.09	5.12	4.95	5.73	5.35	4.17	9.88	3.22	2.54	7.88	9.91	10.18	5.79	11.71	9.44	5.58	4.22	5.28	5.59	15	8.59	5.59	10.76	10.62	5.82	4.95	5	9.74	4.83	4.47	8.67	5	4.08	7.2	8.9	3.8
28	EAM	Intermediate	LOW	11.32	5.74	5.43	13.19	11.14	6.25	5.43	3.67	10.34	6.25	5.15	6.15	4.52	6.1	6.15	5.15	12.14	3.35	3.93	8.66	9.88	10.89	5.35	13.02	11.24	4.93	4.15	5.15	3.67	14.11	9.42	5.05	7.45	9.85	6.39	5.35	4.15	10.87	4.15	3.93	9.7	3.93	3.35	7.25	9.48	4.67
29	EAM	Low	LOW	11.7	3.8	3.97	14.64	10.82	6.23	4.39	4.71	10.12	5.05	4.26	5.26	3.97	5.12	5.61	4.5	10.95	0.8	2.39	8.15	10.09	10.52	5.56	11.93	10.64	4.12	3.61	5.19	3.61	15.48	9.19	4.12	10.32	9.8	4.97	5.66	3.97	10.53	2.39	2.39	8.95	3.8	4.12	6.19	9.61	3.8
30	EAM	High	INTERMEDIATE	11	5.26	4.37	12.26	11.62	6.65	5.65	5.14	10.81	5.14	4.14	6.26	4.73	6.08	5.37	5.02	11.69	1.56	3.14	7.95	10.31	10.24	5.47	12.34	9.68	4.88	4.14	5.65	1.56	15.01	9.52	4.88	8.45	10.38	6.14	5.26	4.37	10.52	2.56	2.56	8.07	5.14	4.73	6.73	9.45	3.88
31	EAM	High	LOW	7.53	5.49	5.52	9.33	9.33	6.08	4.66	3.58	8.93	6.07	4.9	6.22	4.7	5.73	4.86	4.47	8.88	3.4	1.81	7.58	9.03	8.61	5.28	11.18	6.83	5.47	2.58	5.76	4.68	14.86	7.51	4.72	9.65	10.38	5.91	3.98	4.42	8.63	4.51	4.04	6.7	4.58	4.07	6.86	8.05	3.19
32	EAM	High	LOW	8.95	5.78	5.62	13.9	9.2	6.14	4.84	3.4	8.89	6.29	5.26	6.42	5.47	6.02	5.5	4.53	9.02	3.4	2.4	7	8.96	9.23	5.91	10.63	8.23	5.61	3.4	5.74	5.31	14.44	7.84	5.23	10.04	9.5	6.04	4.84	5.31	9.07	4.51	4.28	7.37	5	4.18	7.78	7.95	3.35
33	EAM	High	INTERMEDIATE	11.57	5.83	6.24	14.31	11.08	5.33	5.44	7.33	10.02	6.35	6.16	5.44	4.55	5.24	5.2	5.01	10.84	2.48	2.48	8.52	9.37	11.08	5.68	12.61	8.62	5.88	3.86	5.48	5.06	13.26	9.71	5.8	10.09	9.33	6.01	4.48	5.4	9.92	5.33	5.16	8.43	4.91	3.62	7.12	8.91	3.96
34	EAM	Intermediate	INTERMEDIATE	9.58	5.79	5.94	14.01	11.43	6.54	5.51	3.67	10	6.62	6.06	5.92	5.44	6.35	5.44	5.37	11.29	3.41	2.41	6.53	9.21	10.47	5.7	12.36	8.4	6.26	3.41	5.73	4.99	14.07	8.54	5.58	10.06	10.38	5.73	5.17	4.17	9.33	4.17	5.17	7.43	4.67	4.26	7.09	8.48	4.17
35	EAM	NA	LOW	12.53	5.89	5.01	14.46	10.87	6.13	5.01	5.89	10.04	6.23	4.75	6.13	5.01	6.01	5.89	4.75	11.64	3.43	4.01	8.47	10.18	11.5	5.89	12.45	10.42	4.75	5.23	4.75	4.01	15.56	10.05	5.89	10.72	10.22	7.01	6.01	4.43	10.59	2.43	4.01	8.78	5.01	4.75	7.51	9.2	4.75
36	EAM	Intermediate	LOW	9.61	5.26	5.71	12.29	11.1	6.28	5.21	3.57	10.57	6.37	4.99	5.88	4.76	6.37	4.76	4.61	10.72	3.31	2.57	8.28	9.26	9.15	5.24	11.68	8.1	5.07	3.65	5.33	4.93	14.18	7.98	4.86	8.29	9.94	5.97	4.57	4.65	9.4	4.57	4.1	7.59	4.16	4.31	6.87	8.66	2.99
37	EAM	Intermediate	LOW	10.83	5.57	5.89	13.57	10.57	6.02	4.85	4.54	9.72	6.7	6.02	4.94	3.8	6.04	5.29	3.89	10.29	2.89	2.48	8.41	9.58	10.26	5.85	12.18	8.85	5.54	3.7	5.54	5.35	14.62	8.73	5.65	9.89	10.1	6.1	5.02	4.8	9.9	5.18	4.85	8.72	4.54	4.14	7.12	8.81	3.48
38	EAM	Low	LOW	10.31	6.08	6.22	15.06	10.74	6.35	5.44	4.33	8.84	6.7	6.35	5.8	5.33	6.72	5.92	5.39	10.76	4.16	2.96	7.48	10.29	9.05	6.23	11.67	8.19	6.44	4.03	6.28	6.03	14.96	8.79	5.47	10.96	9.24	6.83	4.99	5.92	9.47	5.49	5.28	7.26	5.63	4.68	7.41	8.3	3.96
39	EAM	High	INTERMEDIATE	9.5	5.15	4.71	12.68	11.42	6.03	4.71	3.71	9.71	5.36	3.9	5.76	4.36	5.36	5.71	5.3	11.35	2.9	0.9	8.85	8.97	10.26	4.9	12.4	11.23	4.9	3.9	5.36	3.71	13.06	9.62	4.23	7.11	10.07	5.9	5.23	3.23	11.44	0.9	0.9	10.28	5.55	4.99	7.3	9.52	3.49
40	EAM	Intermediate	LOW	9.44	6.24	6.43	13.06	11.06	5.81	5.05	4.67	9.63	7.24	6.64	5.02	4.1	6.27	5.86	4.84	10.58	2.35	1.93	8.13	8.29	9.8	5.82	12.17	8.51	6.12	3.74	5.35	5.93	14.11	8.89	5.54	8.61	10.01	6.24	4.74	5.76	9.96	5.35	5.67	8.89	5.21	4.05	7.45	8.78	2.52
41	AAM	High	HIGH	7.29	4.94	5.12	12.79	10.8	6.45	4.6	3.12	8.62	5.56	4.66	6.05	5.01	6.35	4.52	4.43	11.14	3.96	2.46	7.57	8.52	9.13	5.3	10.43	7.14	5.2	2.96	5.46	4.73	14.28	8.06	4.16	8.55	9.11	5.01	4.49	3.83	8.6	3.46	3.58	7.34	4.4	3.63	6.5	7.96	3.46
42	EAM	Low	LOW	12.02	4.22	5.07	14.73	11.21	5.6	5.6	5.07	10.09	6.54	4.9	5.71	5.71	5.48	5.36	5.22	11.07	2.9	3.9	8.41	10.22	11.31	4.9	12.39	10.59	3.48	4.9	4.48	4.48	15.21	9.43	5.07	10.82	10.45	6.76	6.29	3.48	10.68	1.9	2.9	9.47	5.48	3.9	6.71	9.85	5.07
43	EAM	Low	LOW	11.95	4.74	3.82	14.93	10.89	5.3	4.74	3.96	9.08	5.85	4.5	4.96	4.2	5.2	5.14	4.2	10.75	3.08	0.5	8.64	9.85	9.94	5.45	11.68	10.43	3.67	3.82	4.82	3.3	15.37	9.24	3.82	10.6	9.97	5.74	5.2	3.82	10.43	4.08	3.08	9.56	5.14	4.08	6.84	9.26	2.82
44	EAM	NA	LOW	12.38	5.24	4.8	14.72	10.12	6.38	5.8	3.34	9.35	6.15	5.24	5.86	4.34	5.04	5.86	4.66	10.75	2.92	2.92	9.37	10.51	10.01	5.34	11.51	10.29	4.8	4.51	5.24	3.34	15.33	9.13	4.34	10.59	10.07	5.73	5.98	4.92	10.41	2.92	2.92	9.49	3.66	4.15	6.7	9.52	3.34
45	EAM	High	HIGH	9.01	6.49	7.06	10.49	11.58	6.85	5.17	3.39	10.33	7.28	7.09	6.39	5.04	7.44	6.01	5.94	11.59	3.58	2.17	9.73	7.12	8.48	5.91	10.67	6.85	6.47	3.91	5.83	5.98	13.2	9.46	6.91	6.52	9.56	6.37	4.49	6.08	9.82	5.63	5.04	7.42	5.79	4.75	7.66	8.86	3.39
46	EAM	Intermediate	LOW	11.21	6	4.15	14.34	10.26	6.63	4.63	3.41	10.12	5.91	4.63	6.07	5	6.15	6	5.53	10.91	3.41	4.41	8.45	10.43	10.39	5.53	12.17	10.27	5.28	4.15	5.53	5	15.62	8.89	4.41	10.3	10.07	6.68	5.73	3.83	10.28	2.83	4.83	9.1	4.15	2.83	6.58	9.36	2.83
47	EAM	Intermediate	INTERMEDIATE	12.14	5.01	4.59	14.23	11.78	7.36	4.59	3.75	10.39	6.07	3.42	5.59	5.12	5.95	5.23	4.88	11.31	3.75	3.75	8.57	10.37	9.52	5.42	12.2	9.99	5.23	4.59	5.01	4.01	15.83	9.33	3.42	9.33	10.05	6.12	5.75	3.01	10.09	2.42	4.01	8.69	4.01	3.75	7.07	9.54	3.42
48	EAM	Intermediate	LOW	11.68	4.92	3.46	14.56	10.18	5.71	4.79	3.79	9.63	5.27	4.27	4.63	4.05	5.55	3.05	3.05	11.17	3.46	1.46	7.97	10.44	10.84	5.46	12.22	11.22	4.46	4.05	4.05	3.46	15.31	9.35	4.05	10.07	10.3	6.16	5.37	3.05	10.94	4.05	3.05	9.86	5.16	3.46	6.11	9.8	4.27
49	EAM	Intermediate	INTERMEDIATE	11.27	4.42	3.25	14.2	11.47	5.06	4.95	4.06	10.11	5.06	3.57	5.57	5.34	5.25	4.84	4.57	10.92	2.84	2.84	7.57	9.79	9.66	4.95	12	9.49	4.25	4.57	5.25	2.84	15.37	9.13	3.84	10.99	9.62	5.89	5.25	1.25	10.41	1.25	2.25	8.66	4.25	3.25	6.54	8.85	4.57
50	EAM	Intermediate	LOW	10.03	6.51	6.92	13.37	11.89	5.68	5.12	4.26	10.86	7.39	7.07	4.97	4.88	6.7	6.15	5.26	11.94	2.97	2.38	7.6	8.78	11.38	6.06	12.83	10.69	6.27	3.7	6.1	6.24	13.54	9.57	6.17	9.66	10.13	6.58	4.93	6.17	10.53	6.21	5.68	9.47	6.15	4.88	8.01	9.23	3.97
51	EAM	Intermediate	LOW	11.12	4.79	3.91	13.81	10.76	4.91	4.65	2.91	10.45	5.42	3.91	5.91	4.79	5.14	4.33	4.65	12.27	1.33	1.33	8.76	9.56	11.21	5.42	12.74	11.01	4.91	5.03	4.91	3.65	14.42	9.62	4.14	10.26	10.36	6.28	5.14	2.91	11.13	1.33	2.91	9.87	4.79	3.91	6.85	9.84	4.14
52	EAM	Intermediate	LOW	11.17	6.3	6.35	14.29	10.06	6.55	5.41	4.21	9.01	7.02	6.49	5.84	4.75	6.46	6	4.65	10.79	3.7	2.7	7.87	9.44	10.34	6.04	11.83	9.27	6.3	3.59	6.19	5.59	14.23	8.67	5.77	10.28	9.97	6.49	5.14	5.1	9.92	5.72	5.72	8.49	5.65	4.89	7.83	8.87	2.7
53	EAM	High	INTERMEDIATE	10.36	6.58	7.02	11.25	11.04	6.35	5.89	4.59	10.03	7.43	6.87	5.84	4.43	7.08	6.26	5.54	10.21	2.93	2.38	7.55	8.81	9.02	6.58	11.8	8.57	6.74	4.29	6.43	6.43	14.08	8.37	6.33	9.03	9.52	6.74	4.81	6.19	9.23	6.39	5.94	7.72	6.11	5.04	8.07	8.27	2.85
54	EAM	Intermediate	LOW	10.62	6.21	6.48	14.38	9.53	4.89	4.89	4.56	9.04	6.94	6.5	4.09	3.94	5.68	5.96	4.18	9.52	2.72	2.6	7.49	9.83	10.07	6.04	11.72	10.09	6.32	3.39	5.77	6.2	15.15	8.52	5.72	9.75	10.14	6.39	4.6	5.85	10.09	5.63	5.53	8.95	5.63	4.46	7.77	8.8	3.23
55	EAM	Intermediate	LOW	10.82	6.78	6.73	14.7	10.11	5.55	5.63	4.78	9.46	7.33	6.92	4.68	3.73	6.04	6.02	5.35	10.28	2.41	3.15	8.3	9.91	10.17	6.22	12.19	9.87	6.35	4.07	6.18	6.22	14.93	8.97	6.48	10.73	9.84	6.83	4.47	5.91	10.53	6.09	5.8	9.28	5.63	4.91	8.03	9.05	3.53
56	EAM	Intermediate	LOW	9.44	6.09	5.85	13.76	11.27	6.36	4.26	4.26	10.04	6.81	5.82	6.14	5.05	6.74	5.9	4.95	11.12	3.42	2.68	8.67	8.95	10.15	5.68	12.49	9.94	6.26	4.09	5.98	5.74	14	9.18	5.87	9.49	9.89	6.26	5.18	5.49	10.72	4.79	5.18	9.66	5.34	4.55	7.66	9.26	3.79
57	EAM	High	INTERMEDIATE	11.34	6.78	6.76	14.49	10.33	5.93	5.39	3.78	9.51	7.04	6.96	5.42	4.36	6.24	6.24	4.86	10.41	2.42	2.19	8.36	10.05	10.01	6.21	11.93	9.39	6.67	4.52	6.21	6.4	14.87	9.02	6.18	11.12	10.05	6.69	4.82	6.35	10.05	5.95	5.44	8.89	5.74	4.47	8.14	8.87	3.42
58	EAM	Intermediate	LOW	10.13	6.49	6.53	14.07	10.48	5.77	5.24	4.44	9.22	7.1	6.7	5.72	5.06	6.05	6.21	4.91	10.91	3.47	1.74	7.99	9.28	10.38	6.18	12.06	9.62	6.42	3.61	6.15	5.97	14.78	8.93	6.05	11.21	9.93	6.59	4.77	5.79	10.18	5.47	5.13	9.08	5.82	4.88	8.05	8.68	3.61
59	EAM	Low	LOW	10.74	6.22	6.54	14.58	10.96	5.91	5.36	4.2	9.59	6.95	6.54	6.03	5.26	6.06	6.28	5.59	12.22	3.31	2.5	7.49	9.57	9.92	6.09	12.14	9.57	6.19	4.03	6.04	5.55	14.73	8.79	5.88	10.49	9.95	6.32	5.06	5.18	10.21	5.53	4.9	8.75	5.41	4.86	7.76	8.61	3.67
60	EAM	Intermediate	INTERMEDIATE	9.8	6.84	6.98	14.05	11.26	6.09	5.64	4.52	9.46	7.48	6.98	5.76	5	6.76	6.38	5.76	11.51	3.72	3	9.24	9.24	11.06	6.46	11.93	9.1	7.85	4.62	6.29	6.52	14.38	8.99	6.75	9.26	9.62	6.87	5.03	6.45	9.27	6.1	5.97	8.04	6.14	4.65	8.31	8.78	2.78
61	EAM	Low	LOW	11.63	4.86	4.27	14.64	10.12	5.11	4.17	4.27	9.49	5.51	3.79	4.86	4.47	5.22	5.33	3.64	10.98	3.27	3.05	8.34	10.21	10.93	4.56	12.09	11.56	3.79	3.79	5.11	0.47	15.16	9.2	4.27	10.1	10.06	5.72	5.05	2.79	10.73	2.79	2.05	9.71	4.72	4.27	6.83	9.36	2.47
62	EAM	NA	LOW	12.71	4.96	5.15	14.82	11.12	6.54	5.85	4.47	9.24	6.36	4.61	5.74	5.91	6.93	6.32	5.96	11.14	3.47	4.15	7.15	10.1	9.88	5.79	11.33	10.4	5.24	3.74	4.96	4.47	15.47	9.29	5.06	10.86	9.43	6.44	6.01	4.15	9.22	3.47	3.15	8.05	5.85	4.15	7.36	9.44	3.47
63	EAM	Intermediate	INTERMEDIATE	11.48	6.15	5.15	14.66	13.09	6.35	5.74	3.83	9.41	6.29	3.83	5.83	6.64	7.12	5.41	5.74	12.44	4.41	4.64	9.06	9.76	9.38	6.15	11.69	9.93	4.64	4.83	5.53	3.41	15.12	10.04	5.53	10.66	9.78	6.78	5.64	4.64	9.5	1.83	4.64	8.64	5.15	5	7.53	9.35	5
64	EAM	High	INTERMEDIATE	10.76	4.82	4.04	13.03	11	5.46	4.57	3.2	9.5	5.15	3.57	5.59	4.44	5.59	5.54	4.25	10.09	2.98	2.72	7.88	9.39	9.91	5.3	12.17	9.65	4.25	2.2	4.64	3.3	15.27	8.4	3.79	9.4	10.29	4.89	5.2	3.64	9.29	0.4	2.2	8.19	4.48	3.85	6.5	8.59	3.4
65	EAM	High	HIGH	9.32	4.25	4.78	14.1	11.4	6.36	5.72	3.66	10.49	6.47	1.08	5.66	5.25	7.35	4.66	4.54	11.29	2.08	3.08	8.46	9.04	11.06	4.89	11.91	10.22	5.94	4.08	5.47	4.99	14.65	8.69	2.66	8.81	9.68	6.08	5.4	5.47	9.9	1.08	3.08	9.12	4.25	4.78	7.87	9.18	3.4
66	EAM	High	LOW	10.7	4.29	4.15	13.96	10.31	5.35	4.53	3.15	9.62	5.15	3.42	4.64	4.92	4.53	5.35	5	10.76	2.42	2.83	7.75	9.37	10.6	5.08	12	10.27	4	2.42	5.29	2.42	14.49	9.17	4.42	10.1	10.13	5.83	5.15	2.83	10.39	2.83	3.15	9.56	4.15	3.15	6.87	9.27	4
67	EAM	Intermediate	LOW	10.56	5.11	3.67	13.42	10	5.48	4.77	3.67	8.77	4.51	2.19	5.15	4.72	4.72	5.26	4.11	9.72	2.45	2.19	7.93	10.18	9.88	4.62	11.31	8.85	4.26	4.19	4.77	3.19	15.7	8.57	3.45	9.7	9.78	4.95	4.95	2.19	9.39	1.45	0	8.03	3.86	3.95	5.62	8.86	3.56
68	EAM	High	INTERMEDIATE	10.6	6.04	5.24	13.2	11.9	6.12	4.58	4.69	9.24	5.9	5.9	4.9	5.08	5.64	5.08	4.58	11.49	2.58	0.99	7.18	8.36	9.76	5.95	11.42	8.27	5.75	3.58	4.16	4.69	14.3	9.34	4.9	8.69	10.49	6.55	5.24	4.45	9.41	4.58	4.45	8.29	4.8	4.9	7.2	8.87	3.32
69	EAM	Intermediate	LOW	10.81	3.31	3.05	14.82	10.09	4	4	2.84	9.25	4.63	3.46	4.35	3.66	3.84	4.18	2.46	9.62	1.14	2.31	7.73	10.2	10.12	4	11.71	10.26	2.46	2.95	4.66	2.46	15.27	8.32	0	10.23	10.3	4.27	4.6	2.46	10.15	2.84	2.14	8.83	3.78	4	6.12	8.79	2.95
70	EAM	High	INTERMEDIATE	10.7	4.14	3.75	14.05	10.58	5.55	4.6	3.2	9.22	4.99	4.14	5.24	4.7	5.3	4.14	3.75	10.53	2.75	1.33	6.69	10.7	9.19	4.75	12.28	8.69	4.65	3.83	5.07	3.33	15.28	8.12	3.65	9.54	9.46	5.42	4.5	3.45	9.36	2.75	1.75	7.3	4.33	3.2	5.77	8.61	2.33
71	EAM	Intermediate	LOW	9.1	4.73	4.66	12.65	10.58	5.11	4.41	3.22	10.65	5.86	3.35	5.51	4.95	5.3	4.5	4.15	10.78	3.22	3.47	8.43	9.26	10.94	4.63	12.35	10.28	4.78	2.41	4.89	3.15	14.29	8.72	3.58	9.66	9.53	5.28	5.27	3.35	10.01	0.82	1.99	9.1	4.85	3.68	6.81	8.81	4.28
72	EAM	High	LOW	10.78	4.54	3.64	14.52	10.97	4.68	4.25	3.05	9.84	5.48	2.73	5.12	4.31	5.19	4.37	4.19	10.87	2.31	2.31	8.47	9.82	11.26	4.25	12.83	11.03	4.05	3.19	4.54	3.54	15.09	9	3.73	9.39	10.19	5.12	4.64	2.9	10.48	0	1.73	9.59	4.19	4.31	7.17	9.29	3.05
73	EAM	Intermediate	INTERMEDIATE	11.45	4.28	2.57	14.03	10.73	4.66	4.16	3.38	10.48	5.28	3.74	5.03	4.66	5.33	4.03	4.57	10.97	2.57	2.16	6.7	10.22	10.74	5.1	12.92	10.4	3.38	2.16	4.66	3.16	15.26	8.69	3.74	10.64	9.59	5.03	5.1	2.16	10.03	0.57	2.9	8.71	4.16	4.16	6.36	9	2.57
74	EAM	NA	INTERMEDIATE	10.71	3.92	4.43	14.12	10.47	5.57	4.28	3.92	9.87	5.76	2.11	5.7	4.7	5.02	4.57	3.92	11.17	2.7	2.11	7.16	9.68	11.17	4.28	12.05	10.44	3.92	4.11	5.02	3.11	14.76	8.76	3.43	9.34	9.94	6.07	5.11	2.7	10.35	1.11	3.11	8.69	4.11	3.92	6.67	9.31	3.92
75	EAM	Intermediate	LOW	10.46	5.29	4.36	14.2	12.9	5.63	5.13	4.36	10.32	6.04	3.04	6.29	5.9	6.56	4.36	5.5	11.66	2.63	3.36	7.52	9.03	10.59	5.68	11.69	9.87	4.74	3.63	4.85	2.63	14.6	9.17	4.95	8.34	9.74	6.04	5.29	3.63	9.32	1.04	2.63	8.45	5.5	3.04	7.55	9.23	5.04
76	EAM	Low	LOW	9.6	4.32	4.06	13.54	10.65	4.67	5.24	2.74	10.36	5.67	3.96	5.44	4.15	5.36	5.06	3.61	10.78	3.32	2.47	7.89	9.89	11.28	4.96	12.63	10.65	4.61	3.61	4.54	2.74	14.69	8.61	3.85	9.26	10.19	5.1	5.06	1.74	10.61	1.15	2.74	9.11	3.85	3.32	6.67	9.13	3.61
77	EAM	Intermediate	INTERMEDIATE	11.3	4.35	2.97	14.32	9.97	4.97	5.04	3.24	9.68	4.65	4.24	4.46	4.11	4.65	4.97	3.97	10.5	3.46	2.65	7.97	10.37	9.81	4.35	11.98	10.38	3.65	2.97	4.11	2.24	15.42	8.91	3.97	11.21	10.08	5.35	5.04	2.97	10.38	0.65	1.65	8.03	3.82	2.97	5.82	8.93	2.97
78	EAM	High	LOW	10.72	3.76	3.62	13.87	10.46	5	6.35	2.3	9.74	4.55	2.76	4.66	3.88	4.43	4.25	3.76	10.34	2.76	2.47	8.4	9.23	10.19	3.94	12.62	10.1	4.11	3	4.34	3	14.98	8.46	2.76	10.02	10.12	4.39	5.16	2.11	10.26	0.88	1.88	8.54	4.21	4.05	6.38	8.9	3.11
79	EAM	Intermediate	INTERMEDIATE	9.96	5.82	6.09	14.54	9.7	5.62	5.06	3.93	9.35	6.46	6.28	5.26	4.39	5.15	6.37	4.18	9.45	2.34	2.34	7.22	9.73	9.82	5.66	12.15	9.18	5.64	3.34	5.56	5.58	14.71	8.34	5.42	10.54	10.55	5.86	4.99	5.6	9.6	5.23	5.18	7.76	5.21	4.62	7.3	8.56	3.99
80	EAM	Intermediate	LOW	10.79	4.69	4.32	14.12	11.01	5.42	4.37	3.6	9.95	5.69	3.76	5.62	4.98	5.35	3.91	3.98	11.3	2.84	1.1	8.76	9.55	11.52	4.69	13.09	10.93	4.69	3.52	5.07	3.6	14.64	8.68	3.1	9.57	9.89	4.56	5.24	3.6	10.37	0	1.52	9.21	4.65	4.22	6.72	9.11	2.98
81	EAM	High	LOW	13.39	4.83	4.83	14.21	13.06	5.45	4.92	5.01	10.2	7.01	4.38	5.88	4.92	6.57	5.09	5.73	12.81	2.92	3.24	7.98	9.68	10.86	5.45	13.15	11.84	4.92	4.73	4.73	4.38	15.46	9.65	5.45	8.92	9.31	6.21	4.92	3.24	9.51	2.51	3.92	8.08	5.97	5.57	6.97	10.07	3.24
82	EAM	High	HIGH	8.99	4.21	5.02	11.45	10.03	6.07	4.02	2.97	9.97	6.11	3.25	6.12	5.12	6.12	4.12	3.62	9.29	3.62	2.75	9.03	7.75	9.51	5.33	11.3	9.06	4.81	3.25	4.97	4.12	14.33	8.38	3.69	7.59	9.86	5.37	5.66	3.56	9.3	0.75	0	7.61	4.56	3.69	6.58	8.62	3.56
83	EAM	Intermediate	LOW	11.86	3.99	3.69	14.76	10.13	4.85	4.92	3.51	10.05	4.99	3.85	5.06	4.88	4.64	5.38	2.92	10.22	3.18	2.18	7.93	10.33	10.26	4.77	12	10.4	3.92	3.92	4.35	3.06	15.32	8.78	3.6	11.57	9.74	4.96	4.77	2.92	10.25	1.18	1.6	8.85	3.92	3.18	6.15	8.91	3.6
84	EAM	Intermediate	LOW	9.57	5.77	5.84	14.53	9.58	5.31	4.88	3.4	9.06	6.49	6.33	5.51	4.33	5.46	5.62	3.91	9.24	3.24	1.48	7.38	9.84	9.9	5.6	11.36	8.8	5.7	3.8	5.4	5.73	15.07	8.39	5.5	11.4	9.71	5.96	4.58	5.31	9.52	5.13	5.11	8.18	5.11	4.51	7.63	8.58	2.74
85	EAM	Intermediate	LOW	11.15	4.32	3.55	14.32	10.34	4.94	4.36	3.61	9.29	5.15	3.32	5.11	4.61	5.11	5.95	4.36	10.09	3.15	2.85	7.72	10.12	9.96	4.51	11.98	9.73	4.2	3.24	4.91	3.55	15.14	8.84	2.96	10.51	9.66	4.77	5.4	2.48	9.87	1.15	1.96	8.23	4.51	3.96	6.36	8.88	3.32
86	EAM	Intermediate	LOW	10.99	4.76	3.23	14.43	9.95	5.41	4.38	3.06	8.95	5.01	3.23	5.1	3.51	4.7	4.38	3.38	9.98	2.64	2.64	7.68	10.02	10.42	5.01	11.58	10	3.51	3.38	4.14	3.06	15.14	8.45	3.76	10.99	9.91	4.76	5.26	2.86	10.16	2.06	2.64	9.05	4.38	3.96	6.16	8.85	3.06
87	EAM	Intermediate	INTERMEDIATE	10.62	4.79	4.5	15.06	11.44	5.63	4.6	3.33	10.3	5.42	2.92	5.77	4.6	5.53	4.6	4.33	11.07	3.33	2.33	6.85	9.98	9.52	5.42	12.44	9.01	4.39	2.75	5.17	3.21	15.08	8.74	3.21	10.93	10.09	5.42	5.24	3.55	10.35	1.33	1.33	8	4.55	4.07	6.5	8.65	3.99
88	EAM	High	INTERMEDIATE	9.39	5.01	5.12	13.61	11.38	6.69	4.53	2.17	9.58	6.17	3.36	6.75	5.92	6.54	4.27	5.25	11.72	4.12	4.17	5.93	9.58	9.73	5.27	11.92	8.27	5.75	3.45	5.59	4.22	14.99	8.85	3.68	9.73	9.08	5.32	5.84	4.61	9.44	0.95	1.68	6.81	4.95	4.68	7.11	8.49	2.17
89	EAM	Intermediate	INTERMEDIATE	9.97	4.8	4.38	13.79	11.09	5.71	4.71	3.89	9.85	5.29	3.38	5.66	4.89	5.29	4.5	4.97	10.43	3.5	3.38	7.61	10.33	9.91	5.29	12.65	9.66	4.61	3.71	4.32	4.05	15.17	9.07	4.32	10.3	9.94	5.97	5.05	3.97	10.13	1.38	2.12	8.22	4.55	3.5	6.85	8.87	3.12
90	EAM	Intermediate	LOW	11.86	4.55	4.69	14.44	11.22	5.45	4.82	3.69	10.38	5.8	3.5	5.69	5.15	5.84	5.42	4.69	11.09	3.01	2.28	7.66	10.13	11.02	4.55	12.86	10.28	4.69	2.01	4.64	3.39	14.9	9.01	3.69	11.34	9.59	5.55	5.01	3.86	10.2	1.69	0.69	8.68	4.73	4.15	6.62	8.87	3.39
91	EAM	Intermediate	LOW	11.68	4.38	3.26	14.79	10.58	5.53	4.32	3.48	9.47	5.32	3.48	5.2	4.8	5.29	5.48	3.58	10.09	2.85	3.58	8.61	10.37	10.03	4.72	11.6	10.46	3.14	3.38	4.92	3.26	15.19	8.9	3.58	11.19	10.15	5.43	4.48	3.38	9.81	2	2	8.76	4.96	3.48	6.42	9.12	3.26
92	EAM	Intermediate	INTERMEDIATE	9.79	6.82	6.99	12.81	9.62	6.6	6.18	3.95	8.3	7.27	6.71	6.9	5.7	6.64	6.52	5.54	9.18	3.91	3.69	8.26	9.53	9.13	6.76	11.24	8.91	6.71	3.83	6.8	6.65	14.65	7.94	5.97	10.02	10.29	6.92	5.92	6.51	9.11	5.43	5.83	7.79	6.16	5.07	8.02	8.22	3.83
93	EAM	Intermediate	INTERMEDIATE	10.62	4.2	3.72	14.09	11.17	5.2	4.46	2.87	9.79	5.25	3.46	5.17	4.76	5.82	4.25	4.46	10.82	3.14	2.14	7.54	9.79	9.8	4.91	11.57	8.79	4.25	3.01	4.6	2.87	15.3	8.59	3.25	9.04	9.94	5.25	4.94	3.36	9.48	0	1.55	7.99	3.87	3.01	6.47	8.72	3.01
94	EAM	Intermediate	LOW	11.04	4.19	3.04	14.68	10.5	4.59	4.28	2.41	9.35	5.19	3.49	4.63	4.24	4.37	5.19	4.19	10.16	2.24	2.41	7.6	9.83	10.4	4.32	12.26	9.94	3.56	2.56	5.04	3.14	14.66	9.11	2.41	10.52	9.93	4.88	4.82	1.82	10.46	0.24	1.56	9.61	4.52	3.32	6.54	8.85	3.32
95	EAM	Intermediate	LOW	11.92	2.85	3.85	14.66	9.97	3.85	3.27	2.49	12.16	5.38	3.38	4.2	4.2	4.68	4.14	3.59	10.36	1.68	1.27	7.33	9.98	10.84	4	12.32	10.3	2.85	2	3.93	2.85	15.19	8.56	2	11.41	9.95	4.93	4.81	2.85	9.89	2	2.27	8.76	4.44	3.68	6.27	8.86	3.27
96	EAM	Intermediate	LOW	9.96	4.37	4.23	13.77	11.66	5.76	4.71	2.79	9.37	5.28	3.37	5.76	4.68	5.47	4.84	4.23	10.27	2.44	2.79	7.59	9.47	9.57	4.47	12.01	9.85	4.79	3.3	4.65	3.73	15.01	8.3	3.37	9.65	10.04	5.35	5.07	3.5	9.75	0.56	1.98	7.93	4.11	4.02	6.36	8.61	3.3
97	EAM	Intermediate	LOW	10.44	4.15	3.69	12.92	9.97	5.65	4.28	2.11	8.38	4.72	3.01	5.41	4.24	4.96	4.83	3.81	9.61	2.81	3.5	7.11	10.14	8.48	4.81	11.16	8.19	4.06	3.57	4.96	3.5	14.37	7.98	3.57	8.18	9.91	5.3	4.72	3.11	9.65	0.11	2.69	7.7	4.32	3.28	5.98	8.56	3.63
98	EAM	Intermediate	INTERMEDIATE	8.6	4	4	10.72	12.23	4.28	3.51	2	10.3	5.25	3	4.67	4.78	4.7	4.59	3.88	11.35	3.12	2.59	7.87	8.72	10.39	3.94	12.81	10.1	3.88	1.74	4.51	2.74	12.79	8.89	2.74	3.12	9.74	4.42	4.55	2.59	10.21	0.42	1.74	9.17	4.06	3.74	6.57	8.62	3.42
99	EAM	Intermediate	LOW	9.54	4.18	4.32	13.61	12.24	4.62	4.03	2.45	10.65	5.47	3.67	4.86	4.56	5.25	4.56	3.56	12.08	2.86	2.45	8.32	8.68	11.95	4.25	13.32	10.97	4.18	2.18	4.67	3.95	12.86	9.07	3.32	7.78	9.72	4.86	5.03	3.32	10.61	2.18	3.03	9.61	4.38	3.45	6.52	8.98	1.86
100	EAM	Intermediate	LOW	9.76	3.73	3.49	13.4	10.67	4.67	3.89	2.61	9.98	5.16	3.03	5.07	4.73	5.01	4.42	3.42	10.04	2.61	2.93	7.68	9.26	10.01	4.78	12.37	9.51	4.12	2.93	4.91	2.93	14.84	8.43	3.2	9.38	10	5.26	5.07	3.49	9.72	1.03	1.03	8.67	4.35	3.67	6.37	8.6	3.28
101	EAM	Intermediate	LOW	9.92	4.07	3.56	13.87	9.79	4.76	3.91	2.84	9.74	5.17	3.04	5.26	3.94	4.85	4.01	2.91	9.34	2.97	2.76	7	9.43	9.5	4.62	11.34	10.13	3.97	2.1	4.97	2.84	14.88	8.46	2.42	9.02	10.44	4.64	4.87	3.04	9.73	1.97	1.68	8.35	4.07	3.76	6.28	8.3	2.6
102	EAM	Low	LOW	10.33	3.97	3.28	14.64	9.81	4.38	3.41	1.69	9.69	5.48	3.21	4.58	3.74	4.58	4.53	2.97	10.2	2.05	2.79	7.34	10.15	10.82	3.84	12.6	10.46	3.74	3.53	4.91	2.69	15.25	8.69	2.21	11.28	10.04	4.58	5.24	2.47	10.3	0.88	0.47	8.51	4.64	3.97	5.73	8.76	3.47
103	EAM	Intermediate	LOW	9.05	4.61	4.33	13.58	10.4	6.26	4.85	2.69	8.64	5.65	3.33	6.34	5.33	6.01	4.22	5.28	10.12	3.69	1.52	7.34	9.09	9.35	4.98	11.47	9.04	4.48	2.33	5.65	4.11	14.56	8.36	3.92	9.79	9.75	5.77	5.05	4.22	9.62	1.85	2.52	8.11	4.43	3.33	6.51	8.78	4.22
104	EAM	Intermediate	INTERMEDIATE	10.41	3.71	2.99	14.36	9.86	5.03	3.96	3.58	10.17	5.15	2.58	4.5	4.03	4.67	4.82	3.26	9.16	2.48	1.67	8.09	9.53	9.32	4.96	11.88	9.79	3.48	2.26	4.55	3.31	15.17	7.97	2.13	10.66	10.09	4.31	4.5	2.67	9.57	0.99	0.67	7.93	3.84	4.03	6.08	8.65	1.84
105	EAM	Intermediate	INTERMEDIATE	10.53	4.79	4.65	13.39	12.12	5.06	4.14	2.91	10.12	5.9	3.79	5.65	4.88	5.93	5.21	4.97	12.17	3.33	3.14	8.07	9.17	11.39	4.72	12.52	10.89	4.91	2.5	4.94	3.42	14.01	9.33	3.42	9.26	9.37	5.88	5.94	3.72	10.49	0.33	1.33	9.48	5.11	4.28	7.33	9.01	3.33
106	EAM	Intermediate	INTERMEDIATE	10.34	7.4	7.43	14.05	9.82	5.94	5.92	4.73	8.73	7.73	7.54	4.62	3.54	6.32	6.8	5.14	9.33	2.43	2.19	7.72	9.57	9.47	6.51	11.35	9.76	7.13	4.29	6.34	7.02	14.87	8.49	6.68	9.9	10.15	6.99	4.38	6.76	9.75	6.83	6.42	8.27	6.36	5.26	8.47	8.55	2.98
107	EAM	NA	INTERMEDIATE	10.57	4.56	3.83	14.17	9.75	4.26	3.96	2.83	9.97	5.34	3.08	5.02	4.5	4.53	5.24	3.64	9.85	2.92	2.53	8.43	10	10.66	4.29	11.99	10.1	3.64	3.58	4.74	3	15.17	8.11	2.15	11.09	9.67	4.5	5.19	2.92	9.78	0.41	1.41	8.48	4.12	3.83	6.29	8.52	2.83
108	EAM	Intermediate	LOW	10.2	3.55	3.19	14.8	10.23	3.79	3.25	2.88	9.4	5.13	3.04	4.22	3.88	4.04	4.65	2.79	9.79	2.25	2.6	8.25	9.58	9.69	4.32	11.82	10.22	2.79	2.38	4.04	2.7	15.27	8.22	2.96	10.44	9.87	4.41	4.68	2.38	9.86	0.38	1.6	8.49	3.7	3.19	6.08	8.65	3.11
109	EAM	NA	INTERMEDIATE	10.93	4.37	3.9	14.63	10.35	4.54	4.02	3.13	9.29	5.5	3.13	4.98	4.06	4.83	4.98	4.17	10.07	2.81	2.9	8.53	9.28	10.52	4.81	11.87	10.34	3.9	2.62	4.69	3.4	14.85	8.42	2.9	10.57	9.73	4.59	5.15	2.98	10.15	1.4	1.98	9.15	3.98	4.13	6.57	8.87	2.98
110	EAM	Intermediate	LOW	11	7	7.11	13.99	10.35	6.38	5.6	4.56	9.31	7.67	7.3	5.16	4.23	6.53	6.4	5.43	10.68	2.61	2.71	7.78	9.11	10.02	6.64	12.35	9.69	6.88	4.33	6.46	6.8	14.45	8.68	6.43	9.96	10.37	6.72	5.11	6.64	9.61	6.3	6.32	8.52	6.02	4.87	8.21	8.62	3.56
111	EAM	NA	LOW	11.13	6.89	6.92	14.09	9.94	6.02	5.8	5.04	9.16	7.61	7.29	4.75	3.24	6.5	6.87	5.08	9.31	2.46	2	7.86	9.62	9.56	6.55	11.54	9.97	7.11	4.28	6.44	6.86	15.22	8.55	6.45	9.74	10.27	6.73	4.64	6.6	9.98	6.41	6.37	8.67	6.23	5.13	8.35	8.64	2.46
112	EAM	Intermediate	LOW	10.3	6.44	6.26	14.72	10.13	5.54	5	4.27	9.16	6.93	6.84	4.57	3.18	5.93	6.23	5.07	9.63	2.05	2.4	7.62	9.25	10.21	6	11.75	9.47	6.4	4.15	6.05	6.18	14.4	8.6	5.98	10.67	9.99	6.16	4.38	6.23	9.92	5.9	5.79	8.86	5.71	4.48	7.81	8.63	2.84
113	EAM	Intermediate	LOW	13.73	4.1	4.58	15.74	10.49	5.86	6.1	5.23	8.39	5.94	4.1	5.58	5.36	6.02	5.1	4.94	10.94	1.77	4.1	7.63	10.48	10.53	5.1	11.81	10.48	3.36	4.36	5.23	3.36	16.16	8.42	4.94	11.42	9.09	6.68	5.77	4.36	8.96	1.77	1.77	7.63	5.1	4.36	6.77	9.05	3.77
114	EAM	Low	LOW	9.92	3.39	3.6	13.44	10.68	4.93	3.93	2.83	8.73	4.27	2.83	4.81	3.72	4.46	3.64	2.6	10.1	2.13	3.13	8	9.47	9.36	4.56	12.17	8.33	3.52	2.68	3.96	3.13	14.94	7.97	2.43	10.23	10.09	4.89	4.02	2.34	9.22	0.76	0.43	7.71	4.27	3.48	6	8.37	2.6
115	EAM	Intermediate	LOW	10.02	5.9	6.18	14.38	9.79	5.51	4.99	4.13	8.83	6.65	6.59	5.13	3.91	5.74	6.13	4.37	9.82	2.32	2.52	7.43	9.39	9.61	5.8	11.34	8.74	5.83	3.56	5.81	5.97	14.68	8.19	5.79	10.51	9.82	5.87	4.65	6.02	9.32	5.42	5.23	8.12	5.49	4.45	7.53	8.22	3.37
116	EAM	High	HIGH	9.95	4.33	3.57	15.15	11.28	5.52	4.44	3.29	9.62	5.02	3.37	5.5	4.95	5.37	5.09	4	11.19	2.5	2.63	6.64	9	9.81	4.69	11.81	8.08	4.25	3.37	4.13	2.95	14.84	8.36	3.29	10.05	9.31	4.66	5.11	2.5	9.2	1.04	2.04	7.6	3.37	4	6.16	8.05	3.37
117	EAM	Low	LOW	9.84	5.29	5.72	13.3	9.02	5.17	4.15	3.07	8.84	5.92	5.85	4.39	3.61	5	5.2	3.22	9.15	2.12	1.68	8.67	8.55	9.31	5.11	11.59	8.46	6.19	3.02	5.23	5.07	14.58	8.27	4.48	9.24	10.03	5.26	4.46	5.24	9.43	4.94	4.61	7.96	4.63	3.97	6.86	8.28	3.07
118	EAM	Intermediate	LOW	10.79	3.26	3.17	14.82	11.05	4.07	3.17	2.96	9.57	4.47	2.72	4.75	4.54	4.17	3.65	3.17	10.1	2.07	2.26	7.49	9.63	9.97	3.65	12.08	9.6	3.26	1.58	4.17	2.26	14.97	8.56	2.07	10.36	9.75	3.9	5.19	1.84	10.15	0.26	0.26	8.93	4.43	3.35	6.26	8.78	2.72
119	EAM	Intermediate	LOW	11.52	4.15	3.42	14.46	11.04	4.51	4.87	3.09	10.01	5.29	3.83	5	4.15	4.97	4.87	3.76	10.32	1.83	2.09	7.46	10.24	10.56	4.09	12.88	9.31	3.68	3.42	4.26	3.6	15.05	8.88	3.21	11.14	10.08	5.12	4.83	2.51	10.15	0.51	1.83	8.15	3.83	3.21	6.54	8.71	2.97
120	EAM	NA	LOW	10.36	3.79	3.73	14.54	10.72	4.02	3.73	3.3	9.49	5.49	3.44	4.79	4.41	4.5	5.32	3.15	10.31	2.79	2.56	7.57	9.58	10.88	4.34	12.34	10.53	3.44	3.15	4.93	2.79	14.71	9.01	3.07	9.94	10.05	5	4.93	2.15	10.35	1.3	1.56	9.3	4.37	3.79	6.43	8.75	2.98
121	EAM	Low	LOW	10.67	4.55	3.04	13.78	10.53	5.59	4.71	4.04	9.89	5.27	4.04	4.98	4.63	4.46	4.63	3.63	11.1	1.46	2.78	8.52	9.23	11.32	4.71	12.73	10.63	4.27	3.63	5.16	2.78	14.79	8.76	4.16	9.43	10.1	5.67	5.59	4.16	10.1	2.78	2.78	9.1	4.27	4.36	7.13	8.85	3.27
122	EAM	Intermediate	LOW	9.72	3.65	4.02	14.68	11.03	5.08	4.11	2.49	9.19	5.17	2.75	5.13	4.53	4.46	5.17	3.6	10.56	2.75	2.8	7.25	9.18	9.93	4.57	11.99	9.49	4	2.55	4.69	2.93	14.61	8.46	2.24	11.1	9.28	4.65	5.08	3.17	9.63	1.75	1.55	8.08	4.65	3.65	6.63	8.48	3.27
123	EAM	Intermediate	LOW	10.4	3.94	3.56	14.16	10.77	5.01	4.38	2.76	9.69	5.47	3.5	5.3	4.25	4.56	4.61	4.18	10.13	2.76	1.66	8.24	9.58	10.32	4.69	12.25	10.15	3.56	3.03	4.83	3.25	14.93	8.57	3.11	9.14	9.85	4.69	5.18	3.38	10.3	1.18	2.32	8.87	4.5	3.66	6.48	8.78	3.76
124	EAM	Intermediate	INTERMEDIATE	10.47	3.66	3.45	15.05	9.64	4.09	3.71	3.45	9.71	4.95	3.61	3.85	4.05	4.33	4.2	2.39	9.67	1.8	1.97	8.08	9.94	10.67	4.48	12.2	10.59	2.89	3.2	4.33	2.13	15.19	8.53	2.5	10.94	10.47	4.01	4.78	1.13	10.28	0.8	1.8	8.59	4.33	3.89	6.01	8.83	2.8
125	EAM	High	INTERMEDIATE	9.33	7.27	7.54	10.67	10.72	6.53	6.03	4.55	9.67	7.79	7.45	5.8	4.76	6.86	6.75	5.78	10.28	3.36	2.7	7.62	8.68	9.12	7.06	11.27	8.43	7.46	4.48	6.68	7.17	14.15	8.72	6.63	9.34	9.98	6.99	4.96	6.86	8.93	6.72	6.45	7.85	6.54	5.44	8.63	8.29	3.43
126	EAM	NA	LOW	9.91	4.23	4.84	12.81	9.64	5.71	4.31	3.16	8.7	5.77	2.31	4.94	4.79	6.16	4.69	3.89	8.71	2.57	2.99	8.14	9.17	7.58	5.2	10.5	7.4	5.23	3.69	4.31	4.31	15.1	7.07	3.16	10.21	10.74	4.45	4.16	4.57	8.8	0	0.99	6.43	3.79	2.99	6.34	8.61	3.69
127	EAM	Intermediate	INTERMEDIATE	11.24	4.29	3.51	14.21	10.16	4.91	4.03	3.16	9.45	4.66	3.03	4.95	4.61	4.66	4.35	3.16	9.76	2.7	2.51	9.18	9.9	10.06	4.16	11.95	9.68	3.03	2.29	3.79	3.03	14.97	8.47	3.29	10.55	10.31	4.23	4.79	2.51	9.71	1.29	1.29	8.34	4.4	3.29	5.7	8.92	3.51
128	EAM	Intermediate	LOW	11.63	4.72	3.47	14.64	9.5	4.57	4.52	3.57	10.1	5.35	2.77	5.16	4.35	5.05	4.77	3.67	10.6	2.94	1.35	8.34	10.34	10.71	4.52	12.82	10.44	3.94	3.35	4.47	3.67	15.07	8.84	3.47	11.02	9.83	4.9	5.19	2.77	10.25	1.35	2.09	8.6	3.67	3.77	5.9	8.84	3.09
129	EAM	Intermediate	LOW	11.09	3.63	3.53	13.9	9.92	3.71	4.67	2.95	10	5.53	2.43	4.63	4.8	4.48	4.48	3.53	10.91	2.21	1.63	8.87	9.54	11.93	3.08	13.08	10.3	3.53	3.08	4.15	3.43	14.42	8.33	2.8	10.63	10	4.58	4.75	1.63	10.51	1.63	1.21	8.91	3.33	3.95	6.43	8.75	3.33
130	EAM	Intermediate	LOW	9.25	4.27	3.45	11.3	10.65	4.49	4.31	1.36	10.43	5.59	3.06	5.24	4.64	4.75	4.4	3.61	9.57	2.17	2.82	7.77	8.94	9.68	4.22	11.99	10.03	3.94	3.17	4.4	2.94	13.64	8.63	2.68	6.02	10.11	4.97	4.72	2.82	10.68	1.36	0.94	8.93	4.06	3.27	6.24	8.91	3.27
131	EAM	Intermediate	LOW	11.18	4.05	2.28	14.17	9.21	3.66	3.96	3.66	10	5.28	2.96	4.13	3.87	4.28	4.91	2.54	10.06	2.77	1.96	8.46	10.11	11.18	4.21	12.72	10.73	3.77	3.42	3.54	2.96	14.89	8.31	3.42	11.16	9.88	4.48	5.13	1.96	10.43	2.77	1.96	8.2	3.66	3.54	6.13	8.82	3.87
132	EAM	Intermediate	LOW	9.02	5.77	5.65	11.35	10.44	5.07	4.84	3.3	10.65	5.96	5.83	5.28	4.11	5.15	6.12	3.15	9.86	2.57	2.68	7.85	8.73	9.72	5.55	11.83	7.54	5.75	3.57	4.15	5.34	14.31	8.15	4.6	8.98	9.89	5.52	4.47	4.65	9.1	5.05	4.98	7.36	4.47	3.98	6.93	8.31	2.79
133	EAM	Intermediate	LOW	10.65	3.86	3.97	13.48	8.98	4.5	4.03	3.31	10.18	4.89	2.39	4.89	4.31	4.17	4.13	3.03	8.13	2.54	2.92	7.78	9.92	8.35	5.08	10.52	8.57	3.22	2.68	4.08	3.03	15.5	7.96	3.13	10.69	9.92	4.35	4.26	2.68	8.69	1.8	1.8	6.66	4.26	3.47	5.47	8.48	2.68
134	EAM	High	INTERMEDIATE	11.06	3.82	3.02	14.71	10.52	4.48	4.26	2.82	9.82	5.37	3.02	4.48	3.72	4.54	3.82	4.02	9.91	3.19	1.6	8.17	10	10.75	4.34	12.42	10.24	4.02	3.6	4.41	3.48	15.07	8.61	2.6	9.91	10.04	5.02	5.06	3.19	10.3	1.02	2.34	9.06	4.48	4.26	6.56	9.17	4.02
135	EAM	Intermediate	INTERMEDIATE	11.13	3.38	3.82	14.74	10.04	4.33	4.33	3.48	9.54	4.82	3.48	5.13	3.74	4.7	4.33	2.74	9.93	2.74	2.74	7.24	10.31	10.17	3.97	12.19	10.26	4.03	3.66	4.1	2.9	15.24	8.76	2.9	11.18	9.99	4.53	4.78	2.9	10.01	2.57	0.57	8.17	4.22	3.38	5.8	8.77	3.03
136	EAM	Intermediate	INTERMEDIATE	10.83	4.65	2.65	14.56	10.2	4.79	4.65	3.33	10.09	5.28	3.79	5.28	4.72	5.19	5.08	4.03	10.82	3.14	3.65	8.93	10	11.37	5.14	12.41	10.54	4.42	3.79	4.24	3.79	15.01	8.86	2.91	9.96	9.64	4.97	5.46	3.79	10.1	1.33	1.33	8.86	4.03	3.91	6.65	9.25	3.79
137	EAM	High	INTERMEDIATE	11.24	4.01	4.34	14.21	11.75	5.04	4.01	3.22	9.94	5.22	3.34	5.25	4.66	5.12	4.01	3.46	11.16	2.57	2.76	6.82	9.49	10.39	4.46	12.62	10.11	4.15	3.08	4.22	3.08	15.21	8.78	3.22	10.02	9.66	5.04	4.97	2.34	9.58	1.34	1.34	8.12	4.28	3.93	6.64	9.07	2.57
138	EAM	Intermediate	INTERMEDIATE	9.95	4.78	4.52	13.45	11.8	6.09	5.21	3.03	10.37	5.91	3.65	6.01	5.21	5.81	4.78	4.81	12.53	4.27	2.74	9.8	8.95	10.57	5.32	12.23	10.39	5.09	2.57	5.32	4.09	14.34	9.05	2.57	9.03	9.26	5.52	5.61	3.89	10.3	0.57	1.15	8.31	4.99	3.96	6.76	8.86	3.47
139	EAM	High	HIGH	9.45	4.14	4.22	11.82	12.14	5.12	4.58	3.51	9.82	5.1	2.64	5.3	4.72	5.1	3.96	3.44	10.25	2.37	2.64	9.49	9.24	8.84	4.64	12.01	8.85	4.22	2.75	4.75	3.37	15.47	7.99	3.14	8.71	9.93	4.7	5.14	3.3	9.33	1.37	1.86	7.5	4.44	3.7	6.41	8.72	2.96
140	EAM	Intermediate	LOW	7.68	4.01	3.52	12.41	12.13	4.24	3.72	2.79	10.39	5.56	3.11	4.9	3.95	4.79	3.59	3.72	11.21	1.79	1.52	7.47	8.38	10.26	4.24	13.03	10.84	4.15	2.9	4.45	2.52	11.93	9.08	3.01	5.24	10.22	4.69	4.45	3.01	10.8	0	0	9.25	4.11	4.2	6.59	9.02	3.45
141	EAM	High	INTERMEDIATE	11.27	5.79	4.46	15.13	12.56	6.55	5.46	3.46	11.46	6.55	4.46	5.46	5.46	6.63	4.46	5.92	11.85	4.79	4.46	7.27	9.41	10.78	6.55	12.14	10.9	4.79	4.05	5.27	4.05	15.48	8.75	5.46	9.11	10	6.71	5.63	5.46	9.9	2.46	3.46	8.16	4.79	4.46	6.99	9.55	4.46
142	EAM	Intermediate	LOW	10.73	3.58	3.12	14.18	10.31	4.58	4.21	1.93	9.47	5.31	3.03	4.12	3.29	4.54	4.12	3.29	9.97	3.29	1.93	7.67	9.24	10.44	4.25	12.11	10.37	3.7	3.37	4.73	2.93	14.62	8.65	3.12	9.72	10.09	4.82	5.38	3.03	10.09	0	1.12	8.94	4.33	3.51	5.99	8.93	3.12
143	EAM	Intermediate	LOW	10.93	3.87	4.33	14.82	9.77	5.36	4.91	3.04	8.49	4.91	3.57	5.98	4.82	5.39	5.22	4.51	10.25	2.67	4.57	6.84	9.9	9.42	5	11.98	9.47	4.04	3.67	5.11	3.77	15.66	9.12	3.67	10.52	9.77	5.45	5.19	3.04	9.9	2.45	3.19	7.7	4.77	2.87	6.34	8.54	5.15
144	EAM	Intermediate	LOW	11.71	3.98	3.61	14.38	10.86	4.61	4.28	3.52	10.31	5.14	3.11	4.05	4.52	4.73	4.61	3.77	11.32	2.33	2.69	8.2	10.14	11.83	4.43	13.07	9.84	3.61	3.69	4.57	3.33	15.07	8.91	3.22	11.32	10	4.73	4.98	2.33	10.36	2.11	2.11	8.05	4.61	2.52	6.29	8.94	2.98
145	EAM	High	HIGH	9.34	4.24	4.48	13.98	11.21	5.19	4.61	2.92	9.83	5.34	3.39	5.99	5.27	5.26	4.92	3.75	11.15	2.34	3.21	6.84	10.11	9.86	4.82	12.22	8.54	4.48	2.84	4.61	3.27	15.15	8.73	2.66	11.33	9.94	4.84	4.96	3.14	9.4	1.07	0.34	6.34	4.3	3.45	6.43	8.26	2.75
146	EAM	Intermediate	LOW	10.03	3.75	4.32	14.14	10.33	4.78	3.75	3.55	9.22	5.14	3.98	5.21	4.55	4.84	4.55	3.14	9.39	2.69	2.81	7.83	9.57	9.95	4.96	12.07	8.9	3.98	3.23	4.14	3.04	15	8.19	3.69	8.89	10.35	4.4	4.72	3.32	9.86	0.23	2.4	8.44	4.32	3.4	6.1	8.49	3.4
147	EAM	NA	INTERMEDIATE	9.48	4.39	3.62	14.73	9.48	5.67	4.76	3.11	7.85	5.63	3.67	5.76	5.11	5.66	4.78	3.88	9.51	3.47	3.3	6.48	9.78	8.37	4.76	11.13	8.09	4.78	3.03	4.82	4.17	15.16	7.75	3.41	11.21	9.08	5.09	5.09	3.17	9.44	1.3	1.52	7	4.9	4.36	6.49	8.3	3.67
148	EAM	Intermediate	LOW	10.42	3.14	4.05	14.7	10.19	4.93	3.81	2.05	9.29	4.98	3.44	5.16	4.64	4.61	4.01	3.3	9.25	2.86	1.05	8.01	9.6	9.74	4.96	11.58	10.07	3.44	2.75	4.51	2.86	14.82	8.56	3.22	10.35	10.38	4.54	4.72	2.86	9.99	1.64	2.86	8.58	4.22	3.3	6.29	8.83	3.14
149	EAM	Intermediate	LOW	10.69	4.09	3.56	14.48	10.38	4.34	3.91	3.29	10.14	5.63	3.29	5.22	4.78	4.6	3.71	3.09	10.3	1.97	2.97	7.15	9.26	10.33	4.6	12.09	10.53	3.47	3.09	4.43	3.19	15.06	8.58	3.63	9.94	9.79	4.43	5.32	2.71	9.82	0.39	2.19	8.67	5.06	4.03	6.04	8.98	3.47
150	EAM	Intermediate	LOW	11.21	3.26	3.67	14.9	10.28	4.12	3.67	3.04	8.86	4.98	3.67	4.73	3.73	4.19	3.87	3.12	9.14	2.04	2.45	7.73	9.5	8.84	4.15	11.46	9.43	3.26	2.67	4.26	2.87	15.09	8.1	2.96	10.48	9.87	4.12	4.73	2.19	9.5	1.19	1.45	7.79	4.33	3.26	6.07	8.8	2.45
151	EAM	Intermediate	LOW	10.63	3.25	4.3	13.51	9.92	5.44	4.34	3.42	8.65	5.42	3.25	5.54	4.16	5.04	4.34	3.16	8.76	3.16	2.25	7.68	9.58	8.97	5.16	11.73	8.47	4.42	2.42	5.06	3.25	15.09	8.08	2.84	10.62	10.34	5.19	4.3	3.5	9.74	0.25	2.06	7.53	4.93	4.01	6.2	8.59	3.65
152	EAM	High	LOW	10.84	3.64	3.64	13.51	11.61	5.27	4.13	3.64	10.14	5.15	3.41	5.69	4.32	5.02	4.45	4.13	9.98	3.13	2.9	6.99	8.82	8.71	4.96	11.39	8.72	3.9	3.32	4.13	3.32	14.55	8.74	3.9	7.89	9.97	4.61	4.87	2.9	9.09	0	0.9	6.99	4.36	3.78	6.41	8.71	3.41
153	EAM	Intermediate	LOW	10.67	3.13	4.22	14.08	9.78	4.99	4.3	3.72	10.06	4.99	2.13	5.04	4.22	4.53	4.45	3.3	10.16	2.94	3.13	8.14	9.86	10.87	4.22	12.25	9.94	4.22	3.3	4.72	2.72	15.14	8.33	2.94	10.74	9.79	5.04	5.53	3.13	9.88	1.13	1.13	7.56	3.83	3.94	6.45	9.06	4.3
154	EAM	Intermediate	LOW	10.79	5.2	4.55	12.36	11.58	5.78	4.43	3.34	9.89	5.98	3.34	6.07	4.9	6	4.51	4.7	10.49	3.8	2.93	7.84	8.96	9.44	4.9	11.75	9.64	4.98	3.59	4.8	3.43	15.1	8.71	4.15	9.13	9.74	5.34	5.27	4.25	9.36	1.34	2.15	7.84	5.01	4.04	6.84	9	3.34
155	AAM	Intermediate	INTERMEDIATE	10.77	3.64	3.4	13.66	10.06	4.87	3.64	3.31	11.4	4.87	2.64	4.84	4.36	4.48	4.71	3.71	10.45	1.9	2.64	7.15	10.09	10.8	4.56	11.95	9.54	3.56	3.64	4.9	3.56	14.79	8.38	2.9	11.21	9.44	4.31	5.07	2.9	10.16	0.9	1.9	8.02	4.01	3.71	6.15	8.61	3.56
156	EAM	NA	LOW	10.7	4.92	3.73	14.24	9.92	4.86	4.18	3.6	9.69	4.52	3.6	5.28	5.03	5.13	5.45	4.18	10.02	2.6	2.28	8.23	10.51	11.88	4.92	12.29	9.82	4.45	3.28	4.18	3.73	15.43	8	2.6	9.31	8.86	5.23	5.6	3.73	9.53	1.86	1.28	7.45	3.08	3.86	6.3	8.81	3.6
157	EAM	Intermediate	LOW	11.13	3.92	3.64	13.91	9.46	4.79	3.58	3.15	8.88	4.38	3.38	4.73	4.19	4.52	4.01	3.31	8.3	2.52	2.23	7.75	10.02	8.65	4.19	10.85	8.82	3.58	2.76	4.64	2.87	15.01	7.96	3.31	9.04	9.85	4.06	4.67	3.06	9.65	0.06	1.87	7.21	3.81	3.92	5.67	8.51	3.52
158	EAM	High	LOW	10.8	3.84	2.93	14.53	10.41	3.52	2.26	3.63	10.19	4.79	3.52	4.74	3.93	4.52	4.33	2.74	10.15	1.93	2.93	7.83	9.75	10.56	4.69	12.53	10.51	3.74	2.52	3.93	3.39	15.19	8.57	3.39	9.92	9.93	4.02	4.84	2.93	10.34	2.26	0.93	9.02	4.46	3.52	6.56	9.28	3.74
159	EAM	Intermediate	LOW	11.21	5.12	3.98	13.48	10.54	4.98	4.1	3.57	9.27	5.35	3.1	5.26	5.3	5.68	4.2	3.72	9.09	3.3	2.98	7.16	9.25	9.19	5.1	10.75	8.95	4.1	1.98	4.1	3.1	15.04	8.12	4.2	9.29	9.88	4.68	5.33	2.98	8.86	1.4	1.4	7.35	3.98	4.48	6.51	8.79	3.4
160	AAM	Intermediate	INTERMEDIATE	10.3	6.48	6.69	13.78	9.2	5.17	5.19	3.91	9.61	7.08	6.78	4.6	4.39	5.8	6.79	3.85	9.2	1.71	1.97	7.5	9.73	10.3	6.18	12.26	9.65	6.32	3.19	6.13	6.57	14.62	8.5	6.03	11	10.01	6.24	5	6.44	9.96	5.86	5.88	8.36	5.83	4.74	7.85	8.25	3.71
161	EAM	Intermediate	LOW	10.93	3.69	3.23	14.77	9.82	4.52	3.55	2.69	9.14	4.27	3.14	4.87	4.59	4.18	4.82	2.4	8.92	2.4	2.93	7.06	9.55	9.38	4.04	11.66	9.27	2.93	3.23	4.14	2.93	15.18	8.08	3.4	11.38	9.93	4.36	4.72	2.69	9.51	2.04	2.55	7.64	4.09	3.93	5.64	8.59	2.93
162	EAM	Intermediate	LOW	8.92	4.76	4.9	14.4	11.89	5.15	5.21	2.09	10.01	5.68	2.51	5.42	5.21	6.06	4.42	3.83	10.51	2.83	3.32	9.33	8.58	8.77	5.37	12.38	8.76	3.68	2.51	5.03	1.51	14.56	7.54	3.83	6.39	9.52	4.97	5.76	3.32	8.38	0.51	2.09	6.87	3.97	3.83	6.42	8.86	3.51
163	EAM	Intermediate	INTERMEDIATE	11.02	3.54	3.5	14.04	10.44	4.89	3.74	2.54	9.18	5.18	2.97	4.92	3.86	4.52	4.12	3.47	9.34	2.92	2.22	7.38	9.5	9.62	4.54	11.53	9.79	3.95	2.54	4.35	2.31	15.4	7.96	2.61	11.16	10.25	4.31	4.96	1.68	9.64	0.54	1.39	8.31	4.58	3.58	6.15	8.78	2.74
164	EAM	Intermediate	LOW	12.13	4.5	2.5	14.76	11.73	3.87	4.08	3.17	10.5	5.08	3.63	4.87	4.08	4.87	4.26	3.34	11.5	3.5	2.5	7.21	9.24	11.69	4.63	12.99	10.73	3.98	3.63	3.98	2.5	15	9.13	4.34	10.76	9.83	5.57	5.3	2.98	9.64	0.17	1.17	8.77	4.87	2.98	6.17	9.16	3.98
165	EAM	NA	LOW	11.03	4.99	3.85	14.57	11.42	6.18	5.12	2.53	9.67	5.78	3.85	4.7	4.85	5.23	4.7	4.99	11.78	3.85	1.53	8.85	9.49	10.77	4.7	12.75	10.2	4.53	4.34	4.12	3.53	15.08	9.18	5.34	9.83	9.93	6.18	5.85	3.85	9.76	1.53	3.85	9.18	2.53	2.53	7.06	9.02	3.53
166	EAM	NA	LOW	11.57	4.09	4.72	13.93	11.16	5.31	4.82	4.09	9.2	6.05	3.5	5.77	4.82	5.44	5.96	4.82	11.19	0.92	2.5	8.27	9.72	10.05	4.38	11.68	9.49	3.72	4.72	4.5	4.24	14.7	9.05	3.72	9.95	9.82	5.72	5.56	4.24	9.84	2.5	2.92	8.9	3.5	3.24	6.44	9.06	4.62
167	EAM	NA	LOW	11.79	4.84	2.67	14.13	9.83	5.52	4.57	4.37	9.86	5.13	4.13	5.75	5.13	5.19	5.31	3.84	10.87	2.25	2.99	8.26	10.49	9.47	5.31	11.67	9.32	3.67	4.13	4.25	4.25	15.7	8.98	4.13	10.19	9.43	5.13	5.47	2.25	9.98	2.67	2.99	7.83	3.84	3.84	5.75	9.02	2.67
168	EAM	High	LOW	12.63	5.27	3.88	14.67	11.5	6.46	5.05	4.2	9.16	5.88	3.2	5.83	4.88	6.2	5.13	5.05	11.53	2.88	3.69	8.82	9.55	9.71	5.52	11.88	9.82	5.46	4.46	5.2	4.34	15.43	9.93	4.69	10	9.28	6.01	4.58	3.2	9.71	0.88	2.46	8.02	4.79	4.34	6.43	9.12	4.2
169	EAM	NA	LOW	10.55	6.6	6.6	13.56	11.75	7.22	5.72	5.01	9.87	7.37	6.82	6.26	5.34	6.34	7.1	6.47	11.24	4.6	4.01	8.12	9.77	9.44	6.01	11.99	8.18	6.1	5.01	5.72	6.18	13.82	9.45	6.77	9.37	10.36	6.87	5.18	5.6	9.77	5.18	5.18	7.87	5.47	4.6	7.51	9.2	2.01
170	EAM	NA	HIGH	11.93	6.42	3.83	13.38	12.96	6.53	5.15	4.42	9.89	5.42	4.42	5.42	5.83	6.83	5.42	6.42	13.6	3.83	2.83	7.15	9.29	8.98	5.83	11.89	8.45	5.42	4.83	3.83	3.83	15.47	10.19	5.42	8.45	9.49	6.42	5.42	2.83	9.43	2.83	2.83	7	4.83	2.83	7	9.24	4.42
171	EAM	Intermediate	LOW	13.43	4.77	3.77	15.02	11.84	7.02	5.94	5.09	9.97	6.23	4.77	5.36	5.09	5.94	5.77	5.09	11.57	2.77	2.77	7.77	10.68	10.16	5.09	13	9.89	2.77	3.77	5.94	5.36	15.28	9.57	3.77	11.31	10.12	6.58	4.36	3.77	10.4	4.36	3.77	8.26	5.58	4.36	6.94	9.4	2.77
172	EAM	NA	LOW	11.46	5.58	4.36	12.72	11.14	5.77	4.77	4.36	9.6	4.77	4.77	3.77	5.09	6.23	2.77	4.77	13.27	2.77	2.77	8.16	9.67	10.82	4.36	12.61	9.83	5.09	3.77	5.09	2.77	15.24	9.29	5.36	7.58	9.6	7.02	5.94	2.77	10.17	2.77	2.77	8.36	3.77	4.36	6.86	9.13	2.77
173	EAM	NA	LOW	12	3.74	2.42	14.18	10.22	6.22	4.22	3.42	9.72	4.88	4	4.22	4.88	5.12	5.12	3.42	10.9	2.42	1.42	8.12	10.41	10.23	4.74	12.06	10.63	3.42	2.42	4.42	3.74	15.62	8.76	3	10.83	10.44	5.5	5.5	4.22	9.77	1.42	3	7.97	4.88	3.42	6.59	9.31	4.42
174	EAM	High	LOW	12.09	6.64	5.23	12.66	10.93	7.5	6.34	5.64	9.99	6.34	2.64	7.17	6.34	7.4	5.23	6.45	11.87	4.64	3.64	9.23	9.96	9.51	6.89	11.78	9.2	6.34	5.45	5.45	5.45	14.74	8.93	5.81	7.73	10.09	7.4	6.45	5.81	10.38	3.64	5.64	8.13	5.23	4.64	7.64	9.2	4.23
175	EAM	High	INTERMEDIATE	13.11	5.72	5.23	14.94	12.15	6.91	6.61	5.91	9.69	6.72	5.72	5.23	5.5	6.72	6.08	6.37	11.62	3.91	2.91	8.3	10.61	9.7	6.23	11.92	9.29	6.08	5.72	4.91	6.5	15.25	9.12	5.91	10.68	10.59	7.77	5.72	6.37	9.57	4.5	5.72	8.3	5.5	2.91	7.82	9.48	4.5
176	EAM	High	INTERMEDIATE	11.95	6.06	6.7	13.58	12.52	7.72	6.35	4.63	10.37	7.11	5.31	7.09	6.31	8.05	5.63	7.01	11.82	4.77	4.48	10.34	10.08	8.72	6.98	10.8	8.54	7.46	5.11	6.06	6.01	15.52	9.04	5.95	9.88	10.37	7.33	5.63	5.56	9.63	5.01	4.31	8.24	5.39	4.63	8.08	8.92	3.63
177	EAM	High	LOW	11.75	5.43	5.54	14.52	12.32	8.03	6.37	5.01	11.87	7.01	3.84	6.89	6.01	7.8	6.75	6.7	11.58	4.17	1.84	7.24	10.24	8.7	6.17	11.76	9.06	5.43	4.43	5.93	4.84	15.65	10.24	5.43	10.92	10.55	7.27	5.54	5.01	9.93	2.84	4.17	8.61	5.93	3.43	7.43	9.59	4.65
178	EAM	High	HIGH	10.09	5.76	4.18	12.8	12.56	6.5	5.05	3.18	10.66	6.05	3.91	5.98	5.18	5.91	5.76	5.4	12.31	4.4	4.18	8.83	8.69	11.27	5.68	13.03	10.49	5.59	4.76	5.68	3.59	13.47	10.11	4.76	7.26	9.97	6.95	5.18	4.18	10.37	3.91	3.59	10.19	3.91	4.59	7.26	9.42	4.18
179	EAM	NA	LOW	13.46	6.01	5.43	14.05	12.72	7.17	6.54	5.84	10.44	7.09	5.43	6.17	5.65	7.49	4.84	6.3	12.29	4.84	4.43	8.2	9.88	9.62	6.01	12.21	9.35	5.17	4.84	5.17	6.17	15.42	9.66	5.65	8.4	9.71	8.17	5.65	5.17	8.95	4.43	4.84	6.65	6.17	3.84	7.17	9.81	5.43
180	EAM	High	LOW	12.19	4.3	4.5	14.31	11.84	5.67	4.3	4.67	8.91	5.67	4.3	5.5	4.5	6.08	4.67	5.3	10.77	3.5	4.08	6.71	9.43	8.81	4.5	11.25	9.42	4.82	2.5	4.3	3.82	15.38	9.3	5.08	10.58	10.08	6.74	5.4	2.5	9.18	2.5	1.5	7.99	5.5	3.5	7.08	9.18	3.5
181	EAM	Low	LOW	11.92	4.48	4.84	14.74	12.1	5.67	5.13	5.25	9.75	6.25	3.99	4.84	5.25	5.76	4.84	4.67	11.87	1.67	2.67	8.87	9.27	11.06	4.67	12.12	10.15	5.48	3.67	4.25	3.99	14.99	8.98	4.84	8.48	10.17	6.42	5.37	4.48	9.86	2.67	4.84	8.66	4.84	4.67	6.58	9.44	4.84
182	EAM	High	HIGH	11.86	5.21	5.08	14.22	11.22	5.43	5.08	4.21	10.46	6.32	3.94	5.87	5.21	5.94	5.87	5.62	12.22	3.21	3.62	8.24	10.02	11.49	5.43	12.66	10.17	4.94	3.94	3.94	4.62	15.02	9.29	4.43	10.07	10	6.75	4.79	4.21	10.38	1.62	2.62	8.61	3.94	4.62	6.98	9.47	3.62
183	EAM	Intermediate	LOW	12.08	3.93	3.28	13.75	11.7	4.86	5.12	4.06	10.39	5.56	3.47	4.86	4.72	5.47	5.28	4.17	12.22	2.06	2.06	8.29	9.94	12.08	4.28	12.69	10.65	4.28	3.47	4.28	3.06	15.15	9.26	4.28	11.79	9.43	5.64	5.43	3.79	10.12	3.28	2.79	8.29	4.86	3.47	6.72	9.09	3.06
184	EAM	Low	LOW	11.84	5.44	5.61	14.36	12.44	7.35	6.03	4.76	9.62	6.61	5.25	5.61	5.9	7.83	5.03	6.53	11.61	4.44	2.44	9.04	10.03	9.67	6.03	11.34	9.18	5.44	4.03	6.03	6.03	15.42	9.38	6.03	11.03	10.12	6.97	5.9	5.03	8.87	3.44	4.03	7.65	5.03	4.76	7.25	9.56	4.03
185	EAM	Intermediate	INTERMEDIATE	9.34	6.07	6.4	13.42	11.05	5.68	4.85	3.78	9.59	6.63	6.4	5.32	4.41	6.12	5.92	4.91	11.04	2.13	2.32	8.19	9.3	10.89	5.55	12.49	9.59	6.27	4.13	5.75	5.82	14.52	8.95	5.82	9.53	10.13	6.58	5.11	5.75	10.16	5.45	5.18	9.11	5.7	4.61	7.53	8.73	3.49
186	EAM	Intermediate	INTERMEDIATE	11.13	2.86	1.86	14	10.84	5.56	4.67	5.67	10.32	5.56	3.45	4.67	5.19	5.45	4.45	4.67	11.62	3.45	2.86	8.05	9.2	11.66	4.86	12.69	9.87	4.19	4.67	4.19	1.86	14.3	9.21	1.86	10.33	10.06	6.56	4.45	2.86	10.56	3.86	4.19	8.42	2.86	2.86	6.77	8.76	4.45
187	EAM	NA	LOW	10.4	6.32	6.52	13.61	11.04	6.48	5.1	4.37	9.61	6.9	6.7	5.37	4.88	6.47	5.98	4.8	11.03	1.99	0.67	7.93	9.24	9.93	5.99	12.4	9.22	6.57	3.48	6.16	6.01	14.81	8.9	5.84	9.45	10.01	6.53	4.37	5.67	9.89	5.7	4.99	8.2	5.43	4.37	8	8.7	3.13
188	EAM	High	INTERMEDIATE	10.95	6.68	6.99	13.97	10.33	6.26	5.64	4.46	9.15	7.36	7.33	5.78	5.33	6.54	6.54	5.46	10.46	2.87	2.61	7.03	9.48	10.43	6.24	11.71	9.3	6.8	4.75	6.37	6.46	14.82	9.32	6.93	10.7	9.72	7.28	5.04	6.12	9.89	6.09	5.9	7.9	6.04	5.42	8.18	8.64	3.09
189	EAM	Intermediate	LOW	10.76	6.35	6.5	13.18	10.22	5.19	5.19	3.6	9.25	6.83	6.86	3.88	3.6	5.77	6.47	3.88	11.46	2.8	2.12	7.54	10.14	11	5.63	12.25	9.16	6.48	4.19	5.82	5.9	15.08	8.6	6.01	10.61	9.74	6.21	4.19	5.52	9.98	5.77	5.5	7.83	5.77	4.44	7.81	8.53	2.38
190	EAM	Intermediate	INTERMEDIATE	9.32	5.52	5.6	13.84	9.78	5.74	4.99	2.99	9.66	6.29	5.44	5.86	5.05	6	5.07	4.26	9.17	3.28	2.94	7.51	9.16	8.49	5.45	11.74	8.55	5.54	3.43	5.65	5.35	14.8	7.73	4.63	10.65	9.87	5.91	4.87	4.91	9.55	4.2	4.37	7.11	5.25	4.39	7.1	8.35	3.79
191	EAM	High	LOW	9.19	5.62	5.91	13.84	9.82	5.84	5.39	2.88	9.56	6.51	5.86	6.04	4.84	6.07	5.49	4.71	9.1	3.62	2.65	7.67	9.16	8.42	5.88	11.63	8.5	5.66	3.51	5.92	5.57	14.76	7.72	4.71	10.57	9.84	5.81	4.89	5.46	9.51	4.84	4.66	7.15	5.25	4.59	7.33	8.37	3.48
192	EAM	NA	LOW	12.12	2.98	5.3	12.27	11.1	6.44	5.79	5.98	13.56	4.98	4.98	5.98	5.57	7.37	4.57	4.98	12.1	3.98	2.98	10.63	9.64	8.15	5.3	10.3	8.34	4.57	4.57	4.57	5.3	15.4	9.09	5.3	7.84	8.62	6.98	4.57	2.98	8.68	2.98	3.98	6.79	3.98	4.98	6.44	9.5	4.57
193	EAM	High	INTERMEDIATE	11.63	5.67	5.09	12.84	11.97	7.74	6.67	3.77	9.4	5.35	4.57	7.23	6.23	7.7	3.35	5.94	12.85	4.57	3.77	6.94	9.77	9.09	6.29	11.73	8.42	5.85	5.23	5.09	5.47	14.48	9.79	3.77	6.9	10.18	7.19	5.94	5.47	9.45	2.77	2.77	7.6	4.35	4.57	7.19	9.3	4.94
194	EAM	High	HIGH	12.25	5.52	5.71	14.28	12.71	6.96	6.17	4.3	10.79	6.3	4.71	5.52	6.04	6.88	5.71	4.71	13.22	3.71	2.71	8.3	9.7	10.7	2.71	12.54	10.04	5.52	4.71	4.71	5.88	15.14	9.57	5.3	8.74	9.6	7.41	6.3	4.71	9.87	4.3	4.3	8.98	5.3	4.71	7.71	9.64	3.71
195	EAM	High	INTERMEDIATE	11.23	6.9	6.93	14.31	9.76	6.14	5.66	4.77	9.06	7.67	7.23	4.3	3.41	6.62	6.62	5.12	9.88	2.77	2.6	7.76	10.04	9.56	6.39	11.48	9.43	6.96	4.35	6.34	6.67	15.11	8.83	6.95	10.63	10.1	7.07	5.09	6.12	10.03	6.15	6.2	8.65	6.44	5.06	8.09	8.97	3.41
196	EAM	High	LOW	9.68	5.7	5.86	11.3	11.85	6.38	4.89	3.16	10.61	6.61	6.09	5.33	5.09	6.33	5.57	4.48	11	3.57	2.57	8.12	8.59	9.61	5.78	12.15	8.48	6.12	4.48	5.74	5.21	12.99	9.43	5.74	7.09	10.3	6.43	4.57	4.38	10.21	5.27	4.57	8.62	4.38	3.38	7.16	8.66	4.48
197	EAM	Low	LOW	11.48	5.21	4.62	14.24	10.54	5.53	4.62	4.21	9.66	4.62	3.21	4.79	4.79	5.71	4.62	4.79	10.77	1.62	3.21	7.55	10.17	9.15	4.43	11.32	9.47	4.94	3.21	5.21	4.21	15.67	8.77	2.62	10.17	10.31	7.18	5.08	1.62	9.68	2.62	1.62	7.32	4.79	3.21	6.62	9.16	1.62
198	EAM	High	LOW	11.35	4.94	4.72	13.56	11.33	5.83	5.13	5.45	9.72	5.72	4.72	5.3	4.45	4.13	6.13	5.3	11.82	3.72	2.13	8.54	9.73	10.55	4.72	12.35	11.54	5.13	3.13	4.72	3.13	14.21	9.75	4.13	6.99	10.3	6.66	5.13	2.13	11.27	2.13	4.13	10.53	5.59	3.72	7.22	9.75	4.13
199	EAM	Intermediate	INTERMEDIATE	9.01	5.87	4.87	11.47	12.37	5.78	5.28	4.87	10.74	6.15	3.7	6.5	5.4	5.7	5.15	5.94	12.12	4.87	1.7	9.09	9.08	11.09	4.5	13.16	11	4.5	4.5	5.15	4.5	11.57	9.8	4.28	5.28	10.39	6.02	4.7	4.02	11.38	2.7	2.7	10.15	5.15	4.28	7.19	9.47	4.5
200	EAM	NA	LOW	11.64	5.27	5.47	14.63	10.44	6.05	6.37	5.05	9.63	5.64	4.79	5.27	5.27	5.64	5.93	5.47	10.94	5.47	4.05	8.02	10.89	11.19	5.27	12.68	10.11	4.05	4.79	5.64	2.47	15.59	9.21	4.47	11.82	9.98	6.99	6.17	3.47	10.42	5.27	3.47	8.49	4.05	4.79	6.71	9.45	4.47
201	EAM	Intermediate	INTERMEDIATE	10.95	5.02	4.02	12.41	11.87	5.9	5.52	5.76	9.86	5.34	4.24	5.34	4.9	6.02	6.14	5.52	12.03	3.44	3.02	6.29	9.79	9.51	5.02	12.3	9.15	3.76	4.02	5.44	4.61	14.06	9.19	4.24	10.56	9.18	6.08	5.44	4.24	9.61	3.02	3.76	6.65	4.61	4.76	6.34	8.75	4.61
202	EAM	Intermediate	INTERMEDIATE	11.32	6.39	5.54	14.98	11.26	6.31	6.39	4.22	9.69	6.12	5.54	6.22	5.68	7.08	7.47	5.39	11.13	2.22	3.8	7.64	10.8	10.49	5.22	12.01	9.65	4.54	3.22	5.39	3.22	15.16	9.09	5.03	10.82	9.8	6.68	6.03	4.8	9.2	3.8	3.22	7.5	4.22	2.22	6.47	9.12	4.22
203	EAM	High	LOW	8.91	4.76	4.48	13.63	11.29	8	6.03	3.84	9.01	6.92	2.99	7.33	6.13	7.08	4.84	5.37	11.62	4.76	4.67	9.23	10.04	9.66	6.86	10.67	8.24	4.92	4.48	5.88	4.48	15.29	9.06	4.67	7.32	10.45	6.58	6.03	4.67	8.98	1.67	0.67	7.36	5.88	4.67	7.53	8.65	3.84
204	EAM	NA	INTERMEDIATE	12.25	5.27	3.4	14.61	11.89	6.51	5.62	4.62	9.22	5.4	4.81	4.4	4.13	6.27	5.72	5.72	11.03	3.81	4.13	8.1	9.98	10.19	4.62	11.53	9.3	4.4	4.62	4.13	4.4	15.18	9.27	4.4	9.63	10	6.67	5.13	4.98	9.15	3.81	4.62	8.47	3.4	3.81	6.27	9.34	1.81
205	EAM	Low	INTERMEDIATE	12.9	4.63	5.43	15.48	13.12	6.71	4.63	5.43	10.35	5.63	3.63	6.53	6.33	7.15	5.95	6.8	11.88	4.95	2.63	7.43	9.65	11.37	5.43	11.96	9.82	5.8	5.21	5.43	4.95	14.52	9.99	5.8	10.82	9.7	7.38	5.8	4.21	8.69	4.21	3.63	8.15	5.43	5.95	7.63	9.17	2.63
206	EAM	High	INTERMEDIATE	11.09	5.1	4.91	12.38	12.55	6.19	4.91	4.1	9.97	5.1	4.1	4.42	5.69	6.01	5.42	4.69	12.22	4.1	4.1	9.65	8.37	9.93	4.69	11.78	10.53	4.69	4.1	2.1	3.1	13.97	9.2	5.1	7.1	9.8	6.8	4.91	4.91	10.02	2.1	3.1	8.67	5.1	4.69	5.91	9.4	4.42
207	EAM	High	LOW	10.58	6.59	6.46	12.53	11.26	6.65	5.41	3.9	9.39	7.07	6.69	5.96	4.49	6.82	5.88	5.29	11.05	3.32	2.32	8.08	9.37	9.61	6.16	11.96	8.57	6.55	3.73	6.11	6.07	14.97	8.71	6.42	9.52	10.29	6.76	5.16	5.73	9.49	5.71	5.54	8.03	5.52	4.69	7.81	8.72	3.43
208	EAM	High	INTERMEDIATE	11.35	4.94	4.48	12.35	11.73	6.48	5	3.48	10.49	7.04	2.07	7	5.34	6.92	4.94	5.53	11.53	4.18	2.8	8.78	8.72	9.88	5.29	12.17	10.33	6.04	4.39	5.34	4.39	14.57	9.21	3.8	8.13	9.75	6.26	5.94	4.87	10.24	2.07	3.07	9.16	4.87	4.65	7.3	8.83	3.48
209	EAM	Low	LOW	12.37	4.72	3.87	13.44	11.36	6.31	4.72	4.14	9.99	4.87	3.87	5.8	4.55	5.94	5.87	4.14	11.11	3.14	3.55	7.82	9.94	9.87	4.55	12.1	9.55	3.87	3.55	3.55	1.55	15.28	8.98	4.55	10.83	10.52	6.41	5.46	3.14	9.91	3.14	3.87	8.04	4.87	4.14	6.76	9.63	4.72
210	EAM	High	HIGH	11.89	4.43	3.85	13.95	11.51	5.93	4.55	4.65	9.87	5.02	3.17	4.85	4.75	5.24	5.09	3.85	11.1	2.43	2.43	7.9	9.94	10.04	5.37	12.71	9.48	4.65	4.31	4.02	3.43	15.18	8.85	3.17	10.21	10.23	5.75	5.09	3.85	9.95	1.85	3.17	8.33	2.85	3.17	5.75	9.36	3.85
211	EAM	NA	LOW	10.24	5.7	4.97	14.98	12.34	6.81	5.47	4.19	9.01	5.9	3.7	7.51	5.84	7.08	5.38	6.02	11.7	4.38	3.7	7.7	9.19	10.05	5.63	11.82	8.68	5.08	3.7	5.55	3.7	14.66	8.94	4.38	10.25	9.52	6.81	4.97	3.7	9.72	2.38	3.38	7.81	4.19	4.19	7.16	8.81	5.19
212	EAM	High	HIGH	10.78	6.34	6.92	12.19	11.8	6.28	5.47	4.02	11	7.54	7.19	5.5	5.06	6.32	5.97	4.87	12.17	3.43	2.43	9.51	8.55	10.76	6.24	12.5	9.54	6.93	4.2	6.06	6.4	14.32	8.79	6.5	8.26	9.94	6.74	5.32	5.75	10.23	5.47	5.89	8.71	5.73	4.75	7.9	9.08	3.7
213	EAM	High	INTERMEDIATE	11.89	4.05	4.41	12.91	11.07	6.05	4.83	4.05	10.6	6.05	3.83	6	4.7	6.49	4.57	4.05	10.52	3.57	3.57	7.57	9.24	8.77	5.15	10.74	8.83	4.41	1.24	5.05	4.7	15.82	8.38	4.41	8.42	9.61	5.89	4.7	3.24	8.9	3.24	2.83	7.1	5.49	3.57	6.7	9.1	3.57
214	EAM	High	INTERMEDIATE	12.89	5.49	5.23	14.66	12.35	7.3	6.23	5.91	9.55	5.91	4.49	6.49	6.08	6.49	4.49	4.91	11.69	4.91	4.91	8.23	9.28	9.3	6.08	11.37	9.66	4.49	5.49	5.71	3.91	15.95	9.73	5.23	9.99	9.4	7.37	5.71	4.49	9.25	2.91	5.23	7.81	4.49	4.91	7.61	9.37	6.08
215	EAM	High	INTERMEDIATE	12.53	2.54	4.34	14.27	10.79	6	4.86	4.12	8.88	5.62	4.34	5	5.24	6.29	5.44	4.71	10.7	2.54	1.54	7.62	10.46	9.71	5.24	11.28	9.9	4.54	4.34	4.54	4.34	15.6	9	4.34	10.76	10.21	6.18	4.86	3.86	9.76	1.54	1.54	8.59	4.12	3.12	6	9.1	3.54
216	EAM	High	HIGH	10.75	3.04	5.12	13.71	12.01	6.77	5.04	2.62	10.17	6.94	4.21	6.5	5.04	6.65	4.21	4.74	12.28	4.62	3.04	8.49	8.59	10.14	4.36	11.63	10.17	5.04	3.04	5.29	4.21	13.94	9.09	4.5	8.45	9.5	6.12	5.74	4.04	9.94	1.04	2.62	8.6	5.36	4.62	7.36	9.41	4.21
217	EAM	High	HIGH	7.3	4.22	3.34	9.8	11.91	5.89	4.46	3.08	10.25	5.57	3.08	6.12	4.46	5.67	3.76	4.34	11.98	3.57	1.76	7.37	8.52	10.81	4.22	12.43	10.5	3.76	3.34	5.22	3.08	12.76	9.69	3.34	4.93	9.66	5.28	4.85	2.76	10.19	0.76	1.76	9.3	4.22	3.08	6.31	9.07	3.76
218	EAM	High	INTERMEDIATE	10.8	4.72	4.72	13.26	11.05	6.16	5.37	5.08	8.39	5.56	2.91	6.04	5.72	6.93	4.37	5	10.84	3.72	3.72	7.78	9.45	7.82	5.16	10.54	9.26	4.5	4.23	5.56	3.91	15.33	8.61	3.72	9.09	9.15	6.23	4.72	4.37	8.6	0.91	1.91	5.96	3.91	4.5	6.72	9	6.4
219	EAM	High	HIGH	11.88	4.5	3.88	13.7	10.22	6.11	4.43	3.5	8.12	5.26	3.5	5.67	4.64	6.18	4.26	4.18	9.35	3.5	1.76	8.37	9.75	8.47	4.18	11.16	8.08	3.76	3.88	4.08	3.88	15.53	8.17	3.35	11.33	10.2	5.39	5.26	3.18	9.07	0.18	0.18	6.52	3.98	2.98	6.01	8.95	4.08
220	EAM	High	HIGH	10.36	5.34	5.5	12.99	10.88	5.31	4.68	2.72	10.35	6.38	6.01	5.21	3.97	5.37	5.21	4.31	11.47	2.53	3.04	8.16	9.16	11.17	5.65	12.59	8.81	5.5	3.97	4.97	5.18	14.08	8.96	5.01	10.14	9.88	5.65	4.31	4.25	10.09	3.72	4.48	9.07	4.25	3.63	6.7	8.92	3.04
221	EAM	Intermediate	INTERMEDIATE	12.78	5.35	3.93	13.63	11.6	5.67	5.05	4.67	9.84	5.81	5.67	4.52	4.52	6.81	5.16	5.26	10.99	2.35	2.93	7.92	10.28	8.33	4.67	11.28	9.23	5.05	2.93	4.35	4.16	15.97	9.26	4.35	10	10.2	6.05	4.93	3.93	9.11	2.35	3.93	7.02	5.16	5.35	6.56	9.52	3.93
222	EAM	High	HIGH	12.02	3.77	4.44	11.7	12.53	6.49	4.9	3.03	11.76	6.2	3.03	5.69	5.35	6.44	4.9	5.53	12.16	3.03	3.44	8.56	8.94	10.03	5.44	12.28	10.41	4.25	3.03	5.69	3.44	13.4	9.08	4.61	6.49	9.52	6.15	4.25	4.25	10.44	2.44	1.44	9.25	5.15	5.03	7.23	9.63	3.77
223	EAM	Intermediate	LOW	10.75	7.16	7.21	14.35	10.18	6.27	5.66	4.88	9.03	7.7	7.42	4.82	4.71	6.55	7.04	4.97	11.15	3.06	1.94	8.01	9.46	10.23	6.76	11.58	9.69	7.19	3.82	6.7	7.09	14.89	8.59	6.61	10.79	10.28	6.95	4.94	6.87	9.59	6.7	6.18	8.59	6.16	5.53	8.48	8.64	2.82
224	EAM	Intermediate	LOW	10.62	6.14	5.79	12.41	11.04	6.03	4.86	3.18	10.32	6.66	6.24	5.84	4.73	6.15	5.54	5	10.81	3.79	2.97	9.25	8.5	9.17	5.83	11.53	8.37	6.25	4.03	5.29	5.75	14.17	9.2	5.32	7.75	8.86	6.03	5.03	4.59	9.02	4.94	4.86	7.67	5.23	4.18	7.36	8.36	3.44
225	EAM	NA	LOW	11.51	4.47	4.3	12.78	11.28	6.05	5.11	2.88	10.6	5.76	3.88	6.39	4.76	6.2	4.76	4.3	11.86	2.3	2.88	7.62	9.45	11.27	5.11	12.63	9.99	4.88	4.88	4.62	3.62	13.95	9.42	3.88	9.21	9.53	6.69	4.3	3.62	10.35	2.88	2.3	8.56	5.55	4.3	6.85	9.24	3.3
226	EAM	High	HIGH	11.42	3.76	3.76	14.14	12.94	5.13	4.66	3.66	10.69	5.6	3.28	4.96	5.04	5.54	3.28	2.96	12.17	2.76	1.54	8.91	8.38	9.85	4.81	12.47	9.3	5	2.28	4.04	3.42	14.79	9.44	3.42	8.34	10.09	5.31	4.86	2.96	9.97	1.54	2.28	8.62	4.81	4.13	6.59	8.74	3.42
227	EAM	High	HIGH	9.96	4.42	4.68	13	11.04	5.95	4.93	2.99	9.57	5.9	3.75	5.56	5.56	5.98	4.88	4.72	11.38	3.75	2.61	8.29	8.4	9.88	5.24	11.93	9.08	5.38	2.75	4.54	4.15	14.63	8.6	3.81	9.66	9.49	5.63	5.33	4.38	9.78	0.29	1.88	7.69	4.68	4.24	6.85	8.51	4.05
228	EAM	Intermediate	INTERMEDIATE	11.5	4.14	4.58	14.75	11.02	6.09	4.81	3.38	9.15	5.93	3.93	5.66	5.54	6.34	4.49	5.04	9.73	3.26	2.49	7.66	9.87	9.44	5.32	11.57	9.38	4.43	2.49	5	3.58	15.62	8.19	3.38	9.68	10.06	6.02	5.14	4.26	8.99	2	1.68	7.74	5.23	4.85	6.84	8.85	3.49
229	EAM	High	HIGH	12.03	3.77	4.36	15.01	10.34	4.58	4.68	4.09	9.51	4.68	4.36	5.29	4.09	4.58	5.02	3.94	10.55	2.36	2.36	7.2	10.36	10.04	4.47	11.69	9.53	3.58	3.94	3.94	3.36	15.77	8.74	3.77	11.45	9.78	5.16	4.68	2.36	9.66	0.77	3.36	7.09	4.68	3.94	5.94	8.61	3.36
230	AAM	NA	INTERMEDIATE	7.24	5.75	4.98	13.39	11.15	6.45	4.42	2.58	10.03	6.26	3.95	6.02	5.66	6.58	4.13	5.19	11.95	3.25	3.64	8.31	8.52	10.54	5.63	12.46	10.07	4.88	3.58	5.55	4.21	13.33	9.51	4.32	6.81	9.47	5.73	6	4.04	10.57	0.58	1.32	9.07	5.21	4.04	8.46	8.8	3
231	EAM	High	LOW	9.88	4.16	3.7	13.42	9.7	5.4	3.7	3.7	10	5.87	3.7	5.75	4.16	5.23	4.79	3.87	11.27	3.51	4.16	7.93	9.67	11.95	4.87	12.67	11.01	4.4	3.7	4.29	2.7	13.97	8.78	4.16	8.78	9.55	6.2	4.7	3.03	10.05	0.7	2.29	9.21	4.16	3.87	6.81	8.96	3.29
232	EAM	Low	LOW	10.63	4.53	4.62	14.72	10.47	5.12	3.34	4.44	9.51	5.74	3.7	4.92	4.92	5.17	4.85	3.53	10.72	2.85	3.85	7.63	9.9	11.01	4.85	12.01	11.02	3.99	3.53	4.85	4.34	15.17	8.87	4.34	9.3	9.87	5.39	5.23	3.85	10.33	1.53	4.23	9.48	3.85	4.44	6.94	9.21	4.44
233	EAM	Intermediate	LOW	10.3	4.8	4.8	12.66	11.47	5.75	5.45	3.31	11.39	6.2	4.45	5.58	5.31	5.69	5.45	4.69	11.7	3.8	2.58	7.75	9.2	10.37	5.16	12.49	10.65	4.9	4.16	5.16	3.31	14.89	8.89	1.99	9.09	10.15	5.9	5.24	3.99	10.4	3.31	4.31	8.91	4.45	3.8	6.77	9.05	3.58
234	EAM	High	LOW	13.12	3.45	4.77	15.4	13.14	6.15	6.03	5.25	10.5	6.53	5.62	4.03	5.77	6.97	6.25	5.45	12.95	4.77	2.45	6.77	10.53	10.12	6.03	12.69	10.3	5.03	3.45	4.77	5.45	15.79	9.33	5.77	10.18	9.41	7.15	5.62	3.45	9.39	3.45	5.03	8.33	5.62	5.03	7.49	9.71	4.45
235	AAM	Intermediate	LOW	10.82	4.6	4.43	13.93	8.97	5.38	4.13	2.75	10.27	5.51	2.43	5.47	4.75	5.18	5.23	3.89	11.36	3.23	2.75	8.4	10.04	11.53	3.43	12.66	10.79	3.89	3.89	4.51	3.6	14.72	9.16	2.75	9.2	9.83	5.51	5.23	2.75	10.61	2.43	3.01	8.62	4.6	4.13	6.23	8.94	3.75
236	EAM	High	LOW	10.31	5.26	3.12	13.71	10.27	4.5	4.6	4.7	10.29	5.38	4.38	4.97	4.5	5.32	4.88	4.12	11.24	3.97	1.8	8.28	9.61	11.43	4.5	12.66	10.5	4.12	4.6	4.6	3.12	14.7	8.97	4.26	10.14	9.92	5.5	5.19	2.38	10.57	0.8	0.8	9.01	3.8	3.6	6.58	9.16	4.38
237	EAM	Intermediate	LOW	11.24	3.94	3.36	13.91	10.72	4.61	3.94	4.06	9.82	5.61	3.17	4.17	3.94	5.06	4.88	4.27	11.03	1.36	2.94	7.5	9.59	10.32	4.06	11.56	11	3.53	2.68	3.36	3.82	14.98	8.92	3.17	9.86	9.75	5.11	3.94	3.17	10.3	2.68	2.36	9.2	4.06	4.17	6.59	9.3	3.82
238	EAM	Intermediate	LOW	11.09	3.46	4.01	14.14	10.79	5.19	4.89	0	9.13	4.97	2.35	5.52	4.46	5.15	3.85	3.93	10.08	2.08	2.35	8.64	8.64	8.86	4.52	11.36	8.84	4.01	2.08	4.67	3.76	14.94	8.49	3.57	9.81	10.26	5.25	5.08	2.76	9.06	0.76	2.08	6.73	4.22	4.35	6.68	8.98	2.08
239	EAM	Intermediate	INTERMEDIATE	10.62	4.36	3.99	14.44	10.25	5.27	5.09	3.99	8.28	4.89	3.99	5.19	4.51	5.09	4.65	4.19	8.96	3.51	3.51	6.89	9.46	8.85	3.77	10.95	8.04	3.99	3.51	5.36	3.77	15.04	8.04	2.77	9.43	10.48	5.77	4.36	2.19	9.07	2.77	2.19	6.77	3.19	3.99	6.36	8.48	4.19
240	AAM	High	INTERMEDIATE	11.38	4.09	2.86	14.1	11	5.45	5.09	5.28	10.82	5.67	4.09	6.49	3.6	4.98	5.18	4.86	11.46	3.28	2.86	8.47	9.97	11.91	5.45	13.09	10.11	5.18	3.86	5.28	4.74	15.06	9.01	4.6	10.58	9.6	6.53	4.98	2.86	10.39	2.86	4.09	8.69	4.98	4.28	6.32	9.14	3.6
241	EAM	Intermediate	LOW	11.53	3.28	2.28	13.44	10.84	3.6	3.87	3.87	9.76	5.37	1.28	3.6	3.6	4.87	4.28	3.28	10.9	1.28	1.28	7.6	9.86	10.3	3.6	11.9	10.74	4.28	3.28	4.28	3.87	15.34	9.08	2.87	9.98	10.24	5.37	4.28	2.87	9.92	3.6	3.87	8.38	5.09	4.28	6.53	9.42	3.87
242	AAM	Low	LOW	10.2	3.67	3.67	14.68	10.04	4.8	4.12	3.54	9.98	5.12	4.3	5.07	3.91	4.3	4.67	1.8	10.57	2.54	0.21	7.93	9.67	11.03	4.97	12.24	10.47	4.02	3.38	5.07	3.54	15.11	8.5	3.91	9.71	9.86	5.12	5.07	3.8	9.93	1.8	1.8	8.23	4.02	3.91	6.72	8.75	4.3
243	EAM	Intermediate	LOW	10.75	3.59	3.13	14.48	10.08	4.53	3.13	2.94	9	5.34	3.72	5.04	3.94	3.83	4.53	2.13	9.27	2.13	3.3	7.89	9.78	10.33	4.38	11.69	10.2	3.46	3.3	4.59	1.72	15.4	8.55	2.13	8.9	9.89	4.89	4.3	2.72	10.3	0.13	0.13	8.78	5.18	3.59	6.26	8.83	3.13
244	EAM	High	LOW	10.86	3.07	3.65	14.38	10.7	4.15	3.23	3.52	9.79	4.65	3.07	4.71	3.65	4.71	4.07	2.65	10.14	2.65	2.39	7.79	8.97	10.57	4.65	12.73	10.55	3.23	2.65	4.77	2.07	14.27	8.81	2.39	10.44	9.78	5.31	4.52	2.87	10.25	0.07	1.07	9.1	4.39	3.65	6.25	8.69	2.87
245	EAM	High	INTERMEDIATE	9.33	4.82	4.6	13.81	10.52	5.19	4.68	3.75	9.6	6.26	3.43	5.43	5.39	5.43	4.02	3.43	10.9	2.43	2.75	8.56	7.68	10.15	5.52	12.35	10.48	4.52	3.6	5.48	2.75	14.11	8.89	3.75	9.18	9.95	5.75	5.64	2.43	9.95	0.43	3.02	8.66	4.82	3.43	7.03	8.85	4.52
246	EAM	High	LOW	6.62	5.19	5.07	9.01	12.16	5.95	5.29	3.81	11.84	6.53	4.07	6.24	5.95	6.91	5.39	4.81	10.56	4.49	3.07	10.82	6.81	9.42	5.81	11.7	8.33	6.29	1.49	5.49	4.29	13.77	8.36	4.07	9.02	9.62	6.49	4.66	4.49	9.22	1.49	2.49	7.83	4.49	4.29	7.57	8.15	4.66
247	AAM	Intermediate	INTERMEDIATE	10.47	4.16	3.98	14.45	10.44	5.18	4.41	2.63	9.77	5.43	2.92	5.46	4.54	5.26	4.95	4.59	10.31	2.63	1.04	6.43	9.8	10.2	4.63	12.25	10.19	3.85	2.63	5.13	2.92	14.66	8.4	2.92	10.71	9.38	5.07	4.95	2.78	9.51	1.78	2.04	8.25	4.67	4.04	6.79	8.43	3.46
248	EAM	Intermediate	INTERMEDIATE	11.57	4.53	4.39	14.7	11.19	6.16	4.07	3.07	8.65	5.46	3.65	6.16	6.11	5.93	4.53	4.53	10.11	2.65	3.07	6.93	8.78	9.45	5.16	11.4	9.2	4.98	3.39	5.07	3.88	15.17	8.22	4.65	10.15	9.05	6.32	5.07	3.07	8.56	1.07	2.65	8.28	4.65	4.77	6.62	8.77	2.07
249	EAM	Intermediate	LOW	9.6	4.12	4.31	13.94	11.91	4.64	4.31	1.9	9.96	5.87	3.12	5.77	5.01	5.22	4.12	4.12	11.56	1.9	2.64	7.39	8.98	10.15	4.96	11.78	10.14	4.84	2.64	4.77	3.12	14.51	9.33	4.01	7.47	9.83	6.1	5.12	4.12	9.67	3.31	3.12	9.07	4.56	4.4	6.56	9.19	2.9
250	AAM	NA	INTERMEDIATE	10.63	3.07	2.93	13.98	10.29	5.22	4.47	2.93	9.04	5.28	3.51	4.89	4	4.51	3.7	3.07	9.87	2.78	2.41	6.81	9.62	9.62	4.31	11.32	9.33	3.61	2.93	4.65	3.19	15.31	8.22	3.41	9.45	9.97	5.47	4.82	1.19	9.45	1.61	0.61	8.23	4.19	3.93	5.84	8.68	3.51
251	EAM	High	LOW	9.32	4.47	2.89	13.39	10.49	4.35	2.47	1.89	10.19	6.18	1.89	5.06	4.21	4.7	4.21	3.47	11.03	1.89	2.89	8	9.08	11.8	4.8	12.7	10.97	3.89	2.89	4.21	1.89	13.93	8.52	4.21	8.2	9.66	5.53	6.06	0.89	10.19	3.21	0.89	8.86	4.7	4.06	6.91	9.13	3.21
252	AAM	Low	LOW	10.82	2.36	3.53	15.07	9.44	4.06	3.53	3.53	9.23	5.4	3.94	4.36	3.36	3.68	4.16	1.94	9.75	0.36	2.68	8.08	9.49	10.12	4.06	11.51	10.25	3.36	2.36	4.26	2.36	15.43	8.73	3.16	9.25	10.41	4.26	4.82	0.36	10.13	1.36	1.36	9.14	4.36	3.53	6.46	9.11	2.36
253	AAM	Intermediate	LOW	11.82	4.35	5.11	14.42	10.54	5.27	4.48	2.61	9.24	5.48	4.02	5.35	4.35	5.42	4.93	4.19	10.4	2.02	1.02	7.13	9.52	9.8	4.35	12.04	9.94	3.61	3.35	5.02	4.19	15.13	8.85	2.02	10.2	9.79	6.07	4.83	3.61	9.84	2.02	1.02	8.59	4.61	4.02	6.19	9.02	3.02
254	AAM	Intermediate	LOW	9.29	4.96	4.89	13.08	10.52	5.15	4.65	3.57	11.44	5.09	4.27	5.69	5.15	5.74	3.89	3.89	10.58	3.15	3.15	8.57	9.03	10.19	4.57	11.91	9.86	4.81	4.15	5.09	3.37	14.56	8.62	2.15	7.41	9.81	5.92	5.02	2.15	10.1	2.89	1.57	8.81	4.74	3.57	6.57	8.66	5.15
255	AAM	Intermediate	INTERMEDIATE	11.99	5.06	3.89	15.33	13.05	5.38	4.64	3.06	10.3	6.02	3.35	5.47	5.77	6.19	4.75	4.21	13.42	2.7	2.7	7.27	9.51	10.95	5.35	12.88	9.95	4.47	2.21	5.14	4.21	14.6	9.01	4.06	10.07	9.37	5.77	4.47	3.98	9.46	1.89	2.7	9.14	5.41	4.41	7.37	9.24	4.06
256	AAM	Intermediate	INTERMEDIATE	9.48	4.66	4.48	14.5	10.04	5.41	5.04	2.84	8.45	5.57	2.93	6.41	5.29	5.5	4.21	4.18	8.64	3.25	3.39	7.29	9.46	8.74	5.51	11.41	9.07	5.23	3.57	5.42	4.45	15.51	7.73	3.74	10.54	9.88	5.29	5.76	4.39	9.45	1.93	1.74	7.3	4.95	4.48	6.68	8.39	3.51
257	EAM	High	INTERMEDIATE	11.82	5.13	4.39	14.91	11.1	6.71	4.98	4.62	9.25	5.27	3.39	6.06	4.98	6.27	5.98	5.13	11.02	3.81	3.39	8.59	10.32	10.53	4.81	11.73	10.1	4.62	3.81	4.62	4.39	15.42	8.99	4.13	10.37	9.79	6.2	5.81	4.13	9.7	1.81	2.81	8.23	4.13	4.81	6.71	9.14	3.81
258	AAM	NA	INTERMEDIATE	11.67	4.63	5.28	13.55	11.17	6.34	5.52	3.82	10.6	5.14	2.82	5.63	4.14	6.4	3.4	5.73	12.33	4.4	3.82	8.1	10.29	11.62	4.63	12.77	10.38	5.28	4.63	5.14	4.82	14.9	9.66	5.14	9.91	9.53	6.57	5.4	4.82	10.32	3.4	4.14	9.07	4.14	4.14	7.03	9.78	4.4
259	AAM	Intermediate	LOW	11.04	4.79	4.64	13.17	10.54	5.79	5.79	3.05	9.97	5.27	3.79	5.64	4.64	6.32	3.47	4.27	11.39	3.47	3.05	8.52	9.96	10.29	4.27	12.43	9.88	4.27	4.27	5.55	2.47	14.77	8.85	3.05	9.54	10.63	5.79	5.37	3.79	10.02	2.47	2.47	7.84	3.79	4.27	6.27	8.97	4.05
260	AAM	Intermediate	LOW	11.65	4.92	4.01	14.78	9.79	5.48	4.78	2.73	8.83	4.73	3.51	5.24	4.51	5.75	4.92	4.24	11.6	3.24	2.51	7.01	10.28	9.68	4.68	11.27	10.15	4.38	4.56	4.78	3.92	15.52	8.26	3.24	10.4	9.69	5.56	5.05	3.51	9.84	0.92	1.51	8.41	4.56	3.92	6.38	8.66	2.73
261	AAM	Intermediate	LOW	11.06	5	4.64	13.43	10.09	5.74	5	3.16	9.53	5.79	4.16	5.36	4.53	6.12	5.16	5.23	10.63	3.42	2.42	7.34	9.7	10.2	4.16	12.36	10.77	4.83	4	5	4	14.25	9.06	4	9.52	9.85	5.92	5.42	4.16	10.4	0.83	2.83	8.99	4.16	4.16	6.64	8.93	4.42
262	AAM	Intermediate	LOW	11.23	5.09	4.02	14.31	11.55	6.43	5.02	2.28	9.95	5.74	4.4	6.12	5.56	6.19	6.83	5.51	11.49	3.28	3.02	6.97	9.39	9.81	5.79	11.96	9.64	4.61	3.02	5.09	4.02	14.83	9.12	4.79	10.24	9.77	6.31	5.56	4.16	9.96	3.28	2.7	8.09	4.87	4.51	7.11	9.09	3.51
263	AAM	High	HIGH	11.97	4.87	4.68	14.55	10.3	6.04	5.57	4.68	10.92	5.45	4.68	5.33	3.45	5.78	5.19	4.87	10.61	1.87	1.87	8.69	10.17	9.92	5.04	11.54	9.6	4.45	4.19	5.33	3.45	15.49	9.3	3.45	9.11	10.49	6.39	4.87	2.87	10.15	1.87	3.45	8.44	4.87	4.87	6.62	9.46	5.04
264	AAM	Intermediate	LOW	11.73	4.52	4.76	14.55	12.37	5.7	5.23	3.38	10.29	5.52	3.38	5.91	4.86	6.3	4.76	5.06	12.18	2.06	2.06	9.27	9.28	10.66	5.7	12.88	10.37	4.23	3.38	4.52	3.86	14.61	9.81	3.06	10.33	10.3	5.96	5.23	3.38	10.36	2.64	1.06	8.56	5.06	3.86	6.55	9.46	3.06
265	AAM	Intermediate	LOW	9.33	5.73	5.98	13.17	11.63	7.64	6.49	4.54	10.2	6.06	4.9	6.64	6.06	7.23	6.13	6.38	12.6	3.73	3.73	8.94	9.73	10.97	6.13	12.79	9.93	6.19	5.19	6.26	5.54	14.17	9.65	4.54	10.28	10.16	7.57	5.54	4.54	10.39	1.73	4.73	8.65	5.54	4.54	7.73	9.19	5.06
266	AAM	Intermediate	LOW	8.72	4.76	4.71	13.69	11.05	5.09	3.98	2.39	10.45	5.64	3.13	5.53	4.27	5.13	4.45	4.05	11.28	2.39	3.51	7.82	8.96	11.56	4.51	12.94	10.61	4.66	3.13	4.85	3.51	13.41	8.77	3.98	6.74	9.86	5.61	5.74	2.81	10.55	0	2.81	8.98	4.33	4.13	6.95	8.9	3.81
267	AAM	Intermediate	INTERMEDIATE	10.01	3.93	3.35	13.6	9.63	4.83	4.12	3.01	10	4.87	3.41	5.72	4.74	4.87	4.32	3.22	9.56	3.08	1.08	7.41	9.74	10.64	4.52	11.99	9.15	4.44	2.08	4.91	3.97	15.7	7.79	3.01	10.99	9.62	5.27	4.72	3.22	9.24	1.76	1.93	7.93	4.16	4.54	6.44	8.34	3.67
268	AAM	Intermediate	INTERMEDIATE	10.19	5.02	4.65	14.1	10.24	5.32	4.77	3.53	9.53	5.95	4.07	6.28	4.93	5.71	5.11	4.39	10.52	4.15	3.39	7.89	9.57	11.08	5.11	12.46	10.44	5.32	3.07	5.53	4.59	15.09	8.79	4.15	10.33	10.09	5.8	5.9	4.24	10.41	3.07	2.07	8.68	3.97	4.24	6.84	8.65	4.46
269	AAM	Intermediate	LOW	11.23	4.71	3.71	14.25	9.79	5.82	5.29	3.12	10	5.71	4.12	5.65	4.71	4.58	5.03	3.93	10.14	3.12	3.44	7.72	10.74	11.14	4.58	12.55	10.32	5.51	3.44	5.21	5.21	15.58	8.54	3.44	10.71	9.96	6.08	5.51	3.93	10.24	2.71	3.93	8.26	3.44	4.82	6.55	8.68	2.12
270	AAM	Intermediate	LOW	11.23	4.1	4.48	14.65	12.07	6.06	5.36	3.59	9.33	5.1	4.69	5.78	5.1	6.06	4.78	4.69	10.85	3.1	2.36	9.18	9.82	10.33	4.78	12.64	10.06	4.36	2.78	5.17	4.1	15.19	9.08	3.36	10.37	9.59	6.03	5.3	4.36	9.96	1.78	0.78	8.52	4.78	4.48	7.22	9.14	3.78
271	AAM	High	LOW	11.49	4.91	4.32	12.85	13.73	6.32	5.78	4.32	10.34	7.02	3.32	5.49	4.91	5.91	5.13	5.64	13.69	2.32	2.32	7.45	9.78	9.78	5.49	12.37	8.78	5.78	4.32	4.32	4.32	15	9.12	4.64	7.75	9.44	6.49	5.13	4.32	9.48	4.32	3.32	8.05	5.49	4.64	7.72	8.91	3.91
272	AAM	Intermediate	LOW	9.98	3.72	3.55	13.91	10.45	4.72	3.55	2.55	9.33	4.55	3.14	5.22	4.46	4.68	4.41	3.94	9.62	3.14	3.36	7.24	9.02	10.03	4.2	11.68	9.31	4.2	2.55	3.72	3.64	14.87	8.15	3.64	8.85	9.74	4.98	5.25	3.46	9.3	1.55	1.55	7.89	4.14	2.55	5.98	8.33	3.36
273	AAM	Intermediate	LOW	9.86	5.27	3.88	13.65	10.01	4.92	4.08	3.19	9.65	4.88	4.02	4.62	3.19	3.81	5.19	3.66	9.26	2.66	1.81	9.02	9.32	10.64	4.19	11.92	9.36	5.11	2.3	4.4	3.74	14.55	7.97	4.14	10.77	9.76	5.58	4.49	3.19	9.56	2.95	2.3	8.54	4.14	3.58	6.02	8.54	3.3
274	AAM	Intermediate	INTERMEDIATE	11.82	6.07	5.49	14.96	12.07	5.9	4.49	4.23	10.24	5.71	5.36	5.81	5.61	5.61	5.23	5.61	11.34	1.9	4.23	7.58	8.98	11.22	5.9	12.37	10.42	5.07	4.23	4.9	4.71	14.72	9.03	4.71	10.51	9.65	6.43	5.07	4.49	9.57	2.9	4.23	9.19	4.71	3.49	7.69	8.95	2.9
275	AAM	Intermediate	LOW	9.67	4.29	3.81	14.28	10.05	4.29	4.49	4.49	9.72	5.39	4.49	4.95	4.29	4.66	4.49	4.29	9.89	3.81	1.49	7.22	9.52	9.77	5.19	11.55	10.33	5.39	3.81	5.66	4.66	15.57	8.44	4.49	8.68	10.01	5.88	4.07	2.49	9.69	2.49	1.49	8.74	3.07	3.07	6.35	8.95	3.07
276	AAM	Low	LOW	7.84	5.66	6.18	13.09	11.05	6.77	5.78	2.2	9.35	7.18	4.37	7.12	5.37	6.59	5.41	5.93	9.82	5.15	3.01	6.74	7.6	9.62	5.78	12.52	10.3	5.15	3.52	6.29	5.29	12.34	9.1	4.52	6.66	9.8	6.86	6.15	3.9	9.92	2.78	0.2	9.24	6.01	4.84	7.97	8.45	4.59
277	AAM	NA	INTERMEDIATE	10.59	4.31	4.86	14.63	10.44	5.05	4.72	3.72	9.22	5.49	4.4	4.99	4.79	5.31	4.92	3.72	10.15	2.99	2.4	7.14	9.78	9.9	5.26	12.06	10.02	4.31	3.4	4.86	3.72	15.18	8.52	3.57	11	9.83	5.49	4.65	2.4	9.83	1.99	1.4	8.11	4.65	4.57	6.53	8.68	4.1
278	AAM	Intermediate	LOW	10.94	3.91	4.5	14.03	10.83	5	4.91	4.08	10.21	5.77	4.08	5.16	4.91	5.08	4.82	4.91	11.26	3.24	2.5	7.41	8.95	12.27	4.91	13.13	10.83	4.91	2.91	5	3.72	14.11	8.84	4.61	10.72	9.29	6.12	5.67	3.72	9.74	1.91	2.5	9.19	4.72	4.08	7	8.51	3.24
279	AAM	NA	INTERMEDIATE	10.44	4.45	3.91	14.35	10.52	4.91	4.76	3.5	9.51	5.61	4.05	5.5	4.29	4.64	4.29	3.5	9.94	2.4	2.18	7.39	9.55	9.97	4.45	12.49	10.13	3.91	3.29	4.55	3.84	14.58	8.43	3.18	9.8	9.88	5.05	5.05	3.18	10.14	2.18	1.18	8.98	4.55	4.18	6.29	8.78	3.5
280	AAM	High	HIGH	11.52	4.08	3.61	15.05	10.38	4.39	4.47	3.97	9.45	5.22	3.86	4.77	3.68	4.77	4.89	3.97	10.26	2.03	2.22	7.72	10.4	10.8	4.08	12.8	9.84	4.35	2.68	4.92	2.92	15.29	8.49	4.03	11.53	9.77	4.8	5.37	2.68	10.1	2.22	2.68	8.01	4.47	4.39	6.45	8.61	3.86
281	AAM	Intermediate	LOW	10.85	4.55	3.14	15.18	11.27	5.94	5.72	4.36	9.85	5.8	4.36	5.87	5.01	5.14	4.72	4.55	11.09	4.14	3.87	6.8	10.2	10.62	5.01	12.77	10.38	4.87	3.55	4.36	3.14	14.88	8.92	3.87	9.8	9.71	6.51	5.36	3.55	10.16	1.55	1.55	8.53	4.36	4.55	6.84	8.92	3.55
282	AAM	Intermediate	LOW	8.75	4.76	4	13.02	10.11	4.59	4	2.63	9.36	5.43	4.35	5.43	3.47	4.73	3.47	3.76	10.49	1.89	3.95	6.15	8.95	10.52	4.16	12.77	10.86	4.66	3.55	4.92	3.63	14.24	8.17	4.66	8.32	10.36	5.89	5.84	2.89	10.41	0	1.89	9.52	4.3	3.63	6.24	8.61	3.63
283	AAM	Intermediate	LOW	10.06	4.08	3.26	14.61	9.86	4.03	3.88	2.5	8.52	4.7	3.42	5.39	3.76	4.22	4.53	3.26	8.81	2.5	2.64	6.62	10.12	8.71	4.03	11.12	9.32	3.82	2.35	4.7	2.5	15.14	7.98	2.35	11.02	9.58	4.53	4.57	2.88	9.34	0.76	0.18	7.5	4.08	3.76	6	8.26	3.42
284	AAM	Intermediate	INTERMEDIATE	9.91	3.64	3.73	13.92	10.16	4.9	4.05	3.05	9.25	4.54	3.73	4.94	4.19	4.25	3.54	2.73	10.2	2.54	2.73	7.06	9.67	10.12	4.43	11.62	8.96	3.9	2.54	4.9	3.43	14.95	8.19	3.19	9.07	9.89	4.54	4.48	2.54	9.72	2.31	2.05	8.17	4.86	3.19	6.3	8.61	3.19
285	AAM	Intermediate	LOW	9.34	4.02	5.45	13.86	10.81	5.91	5.37	3.16	9.06	6	3.51	6.36	5.53	6.16	4.95	5.16	10.6	4.28	3.02	6.93	9.55	9.35	5.31	11.76	9.14	4.7	2.51	5.83	4.09	14.69	8.75	3.6	10.6	10.2	5.6	5.95	3.02	9.83	2.28	0	8.09	5.6	4.16	7.38	8.5	4.22
286	AAM	Intermediate	LOW	10.09	3.67	3.61	14.36	9.76	4.64	3.61	3.92	10.02	4.72	2.77	4.99	4.14	4.77	4.39	3.49	9.76	2.55	2.87	7.51	9.34	10.68	4.17	12.24	9.92	3.05	2.97	4.25	2.77	15.11	8.32	2.77	10.46	9.85	4.42	4.9	2.29	10.04	1.77	2.67	8.42	4.17	3.87	5.95	8.59	3.55
287	AAM	Intermediate	INTERMEDIATE	10.05	3.55	3.87	14.47	9.43	4.6	3.72	3.46	9.63	4.14	2.72	4.72	5.36	4.25	4.08	2.36	9.74	1.14	3.01	7.26	9.18	10.83	4.31	12.13	9.8	4.46	3.14	4.64	3.01	15.11	8.62	3.25	9.7	9.91	5.17	4.46	2.55	9.53	2.55	2.72	8.54	4.01	4.36	6.48	8.45	3.36
288	AAM	High	LOW	10.12	5.08	5.29	14.59	12.01	5.29	4.76	3.18	9.25	6.1	4.03	6.31	5.59	6.28	5.08	4.88	13.79	4.22	3.52	7.44	8.43	10.09	5.42	11.6	10.02	4.22	3.08	5.73	4.22	14.06	9.24	3.66	8.65	9.45	5.98	5.4	3.86	10.05	1.59	1.59	9.44	5.57	3.86	7.54	8.78	4.22
289	AAM	Intermediate	LOW	11.17	5.07	3.85	14.47	10.74	5.97	5.07	5.07	10.09	5.07	4.59	5.07	5.27	4.85	5.73	4.27	10.45	2.27	2.27	8.53	9.87	11.07	5.73	12.57	10.35	2.27	3.27	5.44	3.85	15.08	8.92	4.27	10.09	9.97	6.91	5.27	4.27	10.2	3.27	3.85	8.69	4.27	4.59	6.59	9.31	3.85
290	AAM	High	HIGH	10.53	4.77	3.19	13.78	10.13	5.77	4.77	4.19	9.61	5.06	4.41	4.92	5.41	5.06	4.92	2.6	10.37	3.19	1.6	8.17	9.54	10.35	5.69	12.38	9.89	4.19	3.19	4.41	2.6	14.59	8.85	3.92	10.43	10.11	6.3	4.92	2.6	10.72	1.6	2.6	8.58	4.41	3.6	6.92	8.96	4.6
291	AAM	Intermediate	LOW	10	4.44	4.18	14.02	9.99	4.86	4.08	3.44	10.07	5.36	3.08	5.32	4.36	5.56	4.66	4.18	10.72	3.08	2.27	8.01	9.39	11.8	4.36	12.77	10.7	4.73	3.44	4.59	2.59	14.31	8.43	2.86	9.61	9.79	5.56	4.86	3.08	10.11	1.86	2.27	9.01	4.36	3.86	6.52	8.73	4.08
292	AAM	Intermediate	LOW	10.03	4.81	4.35	13.91	11.14	5.52	4.52	3.67	10.27	5.25	3.93	4.93	5.25	5.25	5.25	4.15	11.24	4.35	2.35	8.51	9.38	11.78	4.93	13.03	10.54	4.15	2.35	4.93	4.15	13.82	8.94	3.93	9.07	9.81	5.99	4.67	2.35	10.5	2.35	3.67	9.58	3.35	4.35	6.93	9.02	4.35
293	AAM	Intermediate	LOW	10.69	3.29	3.42	14.87	9.36	4.59	3.53	3.83	9.53	4.08	3.15	4.08	3.64	4.08	4.53	2.42	9.81	0.83	2.64	7.57	9.77	9.93	4.64	12.04	10.09	3.29	3.15	4.69	2.42	15.31	8.54	3.15	10.89	10.24	4.92	4.53	1.83	10.24	0.83	0	8.59	3.74	3	6.31	8.7	2.15
294	AAM	Intermediate	LOW	10.6	5.07	5.74	14.34	10.01	5.74	4.74	5.55	9.19	6.07	4.74	4.74	4.33	4.33	5.33	4.74	9.4	3.74	2.74	7.65	9.47	9.7	5.55	11.67	10.09	7.33	5.07	5.91	3.74	15.03	8.58	6.33	9.79	10.15	7.27	5.07	5.33	9.65	2.74	3.74	7.91	4.74	4.33	7.39	8.81	4.33
295	AAM	Intermediate	LOW	7.95	4.46	4.14	12.06	11.42	4.46	4.95	3.73	10.99	4.95	3.73	4.73	4.14	5.14	4.14	4.73	11.71	4.14	4.46	8.37	8.68	12.17	5.95	13.59	10.76	3.73	4.95	4.14	4.46	12.24	9	4.95	10.57	10.28	6.9	4.73	3.14	10.66	2.14	2.14	9.52	3.14	4.14	7.1	8.83	4.14
296	AAM	Intermediate	LOW	10.06	5.34	5.48	13.37	10.31	6.2	5.29	3.7	9.13	6.23	4.23	6.39	5.44	5.96	5.92	5.53	10.81	4.78	3.12	7.29	9.01	9.99	5.44	12.18	9.41	5.96	3.34	5.78	5.34	14.4	9.1	5.23	9.93	9.73	6.68	5.34	2.85	9.98	0.53	3.34	8.49	5.58	4.34	7.17	8.58	4.12
297	AAM	Intermediate	LOW	10.32	4.09	2.09	13.96	10.39	4.59	4.09	2.83	10.08	4.9	3.83	4.31	3.68	4.31	4.83	3.31	10.48	1.51	3.09	8.27	8.63	12.08	3.83	12.48	9.78	4.21	1.51	4.09	2.51	14.62	8.36	2.83	9.5	9.64	5.51	5.03	3.68	9.96	2.09	1.51	8.81	3.31	3.97	6.09	8.56	3.31
298	AAM	Intermediate	INTERMEDIATE	8.69	4.69	4.06	14.09	10.45	4.85	3.93	3.06	10.27	5.6	3.93	4.85	4.41	4.73	4.51	3.41	10.54	3.06	2.41	7.94	8.76	11.41	4.3	12.57	10.44	3.93	2.6	4.25	2.6	13.48	8.7	1.6	9.34	10.13	4.46	4.65	2.93	10.39	0.6	1.93	9.16	3.41	3.51	6.59	8.82	3.06
299	AAM	Intermediate	LOW	8.67	4.68	4.81	13.32	10.17	5.26	4.16	5.35	10.34	6.35	5.35	4.35	3.35	4.68	4.35	4.16	11.33	2.35	3.68	8.2	8.92	11.95	4.81	12.8	10.19	6.11	2.94	4.68	5.75	13.97	8.62	5.6	8.84	9.64	6.48	5.35	3.68	10.31	1.35	4.35	8.86	3.94	3.35	6.88	8.69	2.94
300	AAM	Intermediate	LOW	9.45	3.84	3.95	13.55	10.4	5.05	3.6	4.46	9.6	5.31	2.46	5.35	4.31	4.84	5.1	3.84	10.09	3.31	1.73	7.81	9.58	10.16	4.39	11.38	8.15	4.79	3.73	4.46	3.46	14.91	8.45	2.95	11.03	9.46	5.1	4.95	3.6	9.63	2.14	2.95	7.67	4.05	3.6	6.25	8.18	1.73
301	AAM	Intermediate	LOW	10.15	4.66	5.29	13.75	10.24	6.49	5.59	3.52	8.78	4.9	2.79	6.68	5.9	6.47	5.49	4.85	10.34	4.29	3.01	6.8	9.06	9.23	4.45	11.53	8.5	5.63	3.9	5.25	4.96	14.71	8.23	4.01	9.25	9.09	6.58	5.69	4.73	9.41	1.2	2.79	7.69	5.76	4.11	7.44	8.39	4.37
302	AAM	Intermediate	INTERMEDIATE	9.46	5.09	4.67	13.94	9.93	4.96	4.96	3.5	10.22	5.59	4.5	5.31	3.82	5.5	4.09	3.09	10.99	3.09	2.5	7.96	9.21	11.15	4.96	12.71	10.31	5.09	3.5	4.5	5.5	14.23	8.92	5.2	8.38	10.16	6.59	4.67	1.5	10.51	2.5	3.09	9.14	3.09	3.5	6.75	8.73	4.82
303	AAM	Intermediate	LOW	9.56	4.5	3.64	13.58	11.2	4.88	4.43	3.64	10.11	5.5	4.27	5.5	4.43	4.99	4.43	4.18	10.36	3.5	1.18	8.12	8.72	11.2	4.5	12.8	10.33	5.09	3.5	4.82	3.64	13.73	9.1	3.18	9.03	10.16	6.04	5.13	3.64	10.52	1.18	2.18	9.51	4.57	4.09	6.81	8.88	3.77
304	AAM	Intermediate	INTERMEDIATE	10.03	3.38	4.64	13.42	11.11	4.96	4.23	4.23	10.05	5.45	2.64	5.86	4.96	5.3	3.64	4.76	11.29	2.06	3.64	7.25	9.44	11.06	4.38	12.82	10.18	4.86	3.86	3.86	3.06	13.6	8.55	3.64	9.8	9.49	5.7	5.38	3.64	9.81	1.06	3.06	7.64	4.86	3.64	6.99	8.56	3.86
305	AAM	Intermediate	LOW	9.52	4.01	4.49	14.58	10.25	4.49	4.14	4.01	9.49	4.27	3.27	5.08	4.38	4.85	5.27	4.49	10.08	0.68	2.27	7.4	9.33	9.46	4.01	11.7	8.72	2.68	3.68	5.27	3.85	13.96	8.74	3.68	9.25	10.24	5.59	4.85	0.68	9.85	2.27	1.68	8.33	3.27	3.49	6.59	8.43	4.38
306	AAM	Intermediate	LOW	10.6	4.09	3.8	13.89	10.38	3.8	3.63	3.95	9.71	5.09	3.63	4.88	4.33	4.21	4.43	3.63	9.73	0.63	1.63	7.24	9.58	10.16	4.88	12.16	10.16	3.8	2.63	5.27	3.63	14.98	8.09	3.8	9.59	10.08	5.49	5.02	2.21	10.14	1.63	2.63	8.53	4.09	3.21	6.43	8.78	2.21
307	AAM	High	HIGH	10.3	3.87	4.74	13.52	10.17	5.74	4.69	2.59	8.75	5.66	2.37	6.41	5.1	5.74	4.54	3.69	8.96	3.95	3.59	7.94	9.3	8.92	4.91	11.38	8.25	4.74	3.37	5.07	3.78	14.83	7.54	2.37	9.19	10.15	5.8	5.24	4.69	8.97	0.78	1.78	7.32	4.64	3.95	6.74	8.07	3.59
308	AAM	Intermediate	INTERMEDIATE	9.18	3.23	4.43	12.91	9.46	4.75	3.6	2.6	9.27	5.13	3.43	5.62	4.85	4.95	3.75	3.13	9.87	2.75	3.13	7.58	9.24	10.43	4.47	12.27	10.06	4.51	3.01	4.33	3.01	14.57	7.74	2.75	9.97	10.22	4.51	5.1	3.01	9.48	2.01	1.43	8.1	4.18	4.33	6.44	8.22	3.6
309	AAM	Intermediate	LOW	9.99	4.51	3.73	13.64	9.25	4.93	4.1	3.51	9.58	5.01	2.93	5.1	4.1	4.51	4.51	4.38	8.95	2.51	3.51	7.8	8.57	10.7	4.1	12.06	9.5	4.63	2.93	4.73	3.73	14.48	7.96	3.51	8.89	9.94	5.73	4.51	1.93	9.53	0.93	2.93	8.34	3.51	4.25	6.35	8.01	3.51
310	AAM	Intermediate	LOW	9.58	4.36	3.42	14.09	9.34	4.29	3.87	2.96	9.93	5.05	3.13	4.42	4.05	4.13	4.05	3.13	10.05	2.55	3.29	6.53	9.55	10.45	3.77	12.5	10.34	4.66	3.29	4.55	3.13	14.46	8.47	3.42	9.62	10.26	5.01	5.13	1.96	9.95	0	2.29	8.08	4.21	3.66	6.03	8.47	2.77
311	AAM	High	INTERMEDIATE	9.72	4.32	4.18	14.7	10.79	5.11	4.44	3.44	9.29	5.61	4.03	5.72	4.95	4.95	4.77	2.86	10.07	3.44	3.67	7.43	9.33	9.3	5.11	11.77	9.21	4.56	2.44	4.86	3.67	14.48	8.33	2.44	10.25	9.77	5.03	4.56	3.67	9.84	0.86	3.44	8.01	4.18	2.86	6.67	8.28	3.18
312	AAM	Intermediate	LOW	10.92	4.48	3.65	14.13	9.63	5.43	4.48	3.65	8.96	5.48	2.8	5.61	4.18	4.94	4.18	3.8	9.06	3.48	2.07	9.21	9.97	9.05	4.39	11.4	9.46	4.73	3.48	4.87	4.07	15.06	8.58	4.07	8.92	9.67	5.65	4.39	2.48	9.77	1.48	2.07	7.74	4.57	4.29	6.57	8.53	3.94
313	AAM	High	LOW	7.98	4.37	4.64	13.18	11.42	5.07	4.64	2.93	10.04	5.29	3.93	5.48	4.64	4.98	5.12	3.93	10.35	3.29	1.7	6.58	8.62	10.5	4.98	12.52	10.12	3.93	3.12	5.07	3.29	12.99	8.78	3.93	7.99	9.68	5.16	5.21	2.93	10.07	2.12	1.7	8.68	3.29	4.12	6.8	8.33	4.12
314	AAM	Intermediate	LOW	8.68	4.78	5.62	12.57	10.53	5.24	5.18	3.54	9.36	6.12	2.86	6.54	5.86	5.62	4.54	4.24	9.26	2.86	3.71	7.01	8.52	9.29	5.49	12.08	9.18	4.78	3.54	5.82	3.99	13.97	8.32	3.71	9.34	9.61	6.06	4.93	3.86	9.85	0.54	1.54	8.64	4.54	4.12	7.71	7.95	3.12
315	EAM	Intermediate	LOW	10.55	6.16	6.85	12.99	12.68	8.26	5.83	2.59	10.62	7.42	3.48	8.03	6.84	8.96	6.08	6.72	12.5	5.21	4.78	9.63	8.57	10.03	6.61	11.8	9.4	6.48	4.17	6.34	5.3	13.55	9.56	5.89	8.85	9.56	6.61	5.61	5.45	9.74	2.1	0	7.95	6.87	5.27	7.21	9.37	3.59
316	EAM	High	HIGH	11.01	5.39	4.75	15.09	11.66	6.02	4.47	3.4	12.55	5.71	3.65	6.36	5.71	5.98	4.9	4.92	11.54	2.85	3.03	7.5	10.06	9.88	5.5	12.58	9.52	4.99	3.59	4.99	3.47	15.46	8.93	4.7	10.86	9.71	5.9	5.23	4.65	9.15	2.65	2.11	7.73	4.88	4.44	6.96	8.76	3.53
317	EAM	Intermediate	LOW	13.35	4.27	4	15.63	13.35	6	5.14	4	9.56	6.1	4.42	5.19	5.85	6.52	5.23	5.46	12.73	3.1	2.1	6.89	10.65	10.11	5.23	12.76	10.61	3.8	3.56	4.56	3.68	15.86	9.19	4.27	11.02	9.05	6.12	4.85	3.42	9.14	0.1	2.9	8.27	4.96	4.56	7	9.32	3.56
318	EAM	Intermediate	INTERMEDIATE	11.79	4.75	4.23	13.59	11.96	5.28	4.47	2.03	9.33	5.64	2.97	5.67	5.25	5.91	4.06	4.61	11.22	2.44	2.44	8.64	9.13	10.13	5.4	11.52	10.33	4.12	2.03	4.87	3.53	15.1	8.59	4.71	8.91	8.94	4.98	5.36	3.49	8.81	0.77	0.03	8.35	5.04	4.2	6.72	8.7	3.35
319	EAM	Intermediate	INTERMEDIATE	12.57	4.8	4.08	14.65	12.52	4.8	4.21	2.36	9.56	5.97	3.8	5.38	5.29	6.43	4.82	4.43	11.27	2.21	2.74	8.39	9.14	9.83	4.82	11.68	9.96	3.85	2.63	4.21	3.56	15.12	9.13	3.8	9.65	9.8	5.58	4.87	3.5	9.11	1.04	2.21	8.63	4.9	3.5	6.65	8.98	3.04
320	EAM	High	INTERMEDIATE	12.77	4.78	4.78	15.22	11.79	5.68	4.91	3.99	9.62	6.22	3.91	6.33	5.55	6.81	5.38	5.47	11.86	2.82	2.82	8.95	9.28	10.47	5.25	11.91	10.74	4.28	3.15	4.95	2.63	15.24	9.2	4.15	9.75	9.09	5.73	5.11	4.47	9.23	1.82	0.82	8.24	4.95	4.47	7.13	9.49	3.41
321	EAM	Intermediate	LOW	12	4.79	3.97	14.33	12.54	5.36	4.43	2.93	9.51	5.7	3.7	5.81	5.33	6.23	4.01	4.72	11.36	2.16	2.93	7.08	9.67	10.26	4.75	11.72	10.54	3.93	2.75	4.75	3.16	15.05	9.19	4.54	9.64	9.67	5.01	4.65	3.36	9.55	0.43	1.84	9	5.16	4.43	6.63	9.27	3.43
322	EAM	High	HIGH	8.07	5.36	5.36	13.64	11.26	7.17	5.78	2.81	9.05	5.93	4.23	6.87	4.75	7.56	5.27	5.93	11.68	3.69	2.81	7.95	11.05	10.41	5.48	11.26	9.42	4.98	3.04	6.09	4.4	15.54	9.08	4.4	9.79	10.02	6.16	5.62	4.32	9.59	2.55	2.55	7.55	5.51	4.32	6.81	9	4.04
323	EAM	NA	LOW	8.9	4.74	4.25	15.13	11.54	6.66	5.25	6.58	8.94	5.98	3.74	6.18	5.39	6.84	4.84	5.46	11.11	3.74	3.52	7.25	10.79	7.63	4.84	10.45	7.34	4.52	3.93	5.25	2.93	14.92	8.55	4.25	7.86	8.2	6.1	3.93	4.39	8.5	2.93	2.93	5.79	5.02	4.52	6.84	8.98	3.25
324	EAM	High	INTERMEDIATE	11.87	7.12	7.3	14.04	11.84	7.76	6.12	4.87	9.95	7.54	7.61	6.42	5.74	7	6.27	6.54	12.04	4.59	2.42	7.68	9.99	10.12	6.94	12.02	8.06	6.84	4.87	6.59	6.32	14.87	9.55	6.94	11.05	9.73	7.27	5	6.17	9.92	5.74	5.59	8.3	5.59	4.74	7.52	9.18	4
325	EAM	High	HIGH	13.37	5.32	3.74	13.2	12.34	6.13	5.83	4.06	10.89	5.74	3.74	5.65	4.91	6.65	5.32	5.74	13.01	4.06	2.74	10.79	8.9	11.45	5.44	12.46	10.54	6.38	1.74	5.55	3.74	15.75	9.63	4.32	8.11	9.67	6.2	4.74	1.74	10.26	3.74	1.74	9.11	3.74	4.06	6.69	9.74	2.74
326	EAM	High	LOW	10.52	4.71	5.54	12.27	12.15	6.29	5.27	1.65	11.22	6.56	3.77	6.68	5.31	7.05	4.53	5.63	10.86	3.59	2.42	8.95	9.41	8.73	5.55	11.69	8.19	4.53	2.79	5.31	3.91	13.98	8.74	3.01	7.68	9.44	5.38	6.04	3.36	9.8	1.16	1.93	7.66	4.48	4.72	6.57	9.08	3.79
327	EAM	High	HIGH	10.38	5.52	4.52	13.45	12.09	5.81	4.44	3.9	10.63	4.95	4	6.26	5.1	6.44	4.28	5.28	12.74	3.52	2.78	8.28	9.61	11.27	5.05	13.2	11.36	4.9	4.1	4.59	3.9	14.28	9.87	4.2	8.34	10.13	5.62	5.28	3.37	10.48	0.2	1.78	9.16	4.78	4.1	6.99	9.3	4.1
[truncated: 14 more columns]
